1 Pooled CRISPR interference screens enable high-throughput functional genomics study and  
2 elucidate new rules for guide RNA library design in *Escherichia coli*

3

4 Tianmin Wang<sup>a</sup>, Jiahui Guo<sup>a</sup>, Changge Guan<sup>a</sup>, Yinan Wu<sup>a</sup>, Bing Liu<sup>b</sup>, Zhen Xie<sup>c,d</sup>, Chong  
5 Zhang<sup>a,d</sup>#, Xin-Hui Xing<sup>a,d</sup>

6

7 <sup>a</sup>MOE Key Laboratory for Industrial Biocatalysis, Institute of Biochemical Engineering,  
8 Department of Chemical Engineering, Tsinghua University, Beijing 100084, China

9 <sup>b</sup>Beijing Syngentech Co., Ltd., Beijing 102206, China

10 <sup>c</sup>MOE Key Laboratory of Bioinformatics and Bioinformatics Division, Center for Synthetic  
11 and System Biology, Department of Automation, Tsinghua National Lab for Information  
12 Science and Technology, Tsinghua University, Beijing 100084, China

13 <sup>d</sup>Center for Synthetic and Systems Biology, Tsinghua University, Beijing 100084, China

14

15 Running Head: CRISPRi pooled screen in *E. coli*

16

17 #Address correspondence to Chong Zhang, [chongzhang@tsinghua.edu.cn](mailto:chongzhang@tsinghua.edu.cn)

18

19

20 **Abstract:** Clustered regularly interspaced short palindromic repeat (CRISPR)/Cas9  
21 technology provides potential advantages in high-throughput functional genomics analysis in  
22 prokaryotes over previously established platforms based on recombineering or transposon  
23 mutagenesis. In this work, as a proof-of-concept to adopt CRISPR/Cas9 method as a pooled  
24 functional genomics analysis platform in prokaryotes, we developed a CRISPR interference  
25 (CRISPRi) library consisting of 3,148 single guide RNAs (sgRNAs) targeting the open reading  
26 frame (ORF) of 67 genes with known knockout phenotypes and performed pooled screens  
27 under two stressed conditions (minimal and acidic medium) in *Escherichia coli*. Our approach  
28 confirmed most of previously described gene-phenotype associations while maintaining < 5%  
29 false positive rate, suggesting that CRISPRi screen is both sensitive and specific. Our data also  
30 supported the ability of this method to narrow down the candidate gene pool when studying  
31 operons, a unique structure in prokaryotic genome. Meanwhile, assessment of multiple loci  
32 across treatments enables us to extract several guidelines for sgRNA design for such pooled  
33 functional genomics screen. For instance, sgRNAs locating at the first 5% upstream region  
34 within ORF exhibit enhanced activity and 10 sgRNAs per gene is suggested to be enough for  
35 robust identification of gene-phenotype associations. We also optimized the hit-gene calling  
36 algorithm to identify target genes more robustly with even fewer sgRNAs. This work showed  
37 that CRISPRi could be adopted as a powerful functional genomics analysis tool in prokaryotes  
38 and provided the first guideline for the construction of sgRNA libraries in such applications.

39 **Importance:** To fully exploit the valuable resource of explosive sequenced microbial  
40 genomes, high-throughput experimental platform is needed to associate genes and phenotypes  
41 at the genome level, giving microbiologists the insight about the genetic structure and  
42 physiology of a microorganism. In this work, we adopted CRISPR interference method as a  
43 pooled high-throughput functional genomics platform in prokaryotes with *Escherichia coli* as  
44 the model organism. Our data suggested that this method was highly sensitive and specific to  
45 map genes with previously known phenotypes, potent to act as a new strategy for  
46 high-throughput microbial genetics study with advantages over previously established  
47 methods. We also provided the first guideline for the sgRNA library design by comprehensive  
48 analysis of the screen data. The concept, gRNA library design rules and open-source scripts of  
49 this work should benefit prokaryotic genetics community to apply high-throughput mapping of  
50 defined gene set with phenotypes in a broad spectrum of microorganisms.

51

## 52 **Introduction**

53

54 Experimental approaches for gene-phenotype mapping are needed to keep up with the pace of  
55 explosive microbial genome sequencing capacity. To handle thousands of poorly characterized  
56 genes in microbes, such experimental methods are expected to be high-throughput, enabling  
57 profiling of genome-wide gene set at multiple growth conditions simultaneously. One  
58 promising method is the high-throughput pooled functional genomics analysis, commonly  
59 performed by mixing a large number of mutants and monitoring their abundance change during  
60 growth with next-generation sequencing(1–4).

61

62 Two categories of methods have been established for such purposes. One widely applied  
63 approach depends on random transposon derived gene knockout library(1, 2, 5). This method  
64 suffers from the random insertion of transposons into the chromosome, resulting in the bias  
65 towards genes with long coding region as well as only applicable to genome-wide rather than  
66 focused library. Moreover, complicated enzymatic and purification steps are required for  
67 library preparation based on transposon mutagenesis(1, 2). An alternative approach depends on  
68 quantifying DNA barcodes in a pooled format. The DNA barcodes are previously associated  
69 with the mutations introduced by recombineering either in a pooled (such as trackable  
70 multiplex recombineering (TRMR)(6)) or arrayed (such as the *Saccharomyces cerevisiae*

71 deletion collection(4), where DNA barcodes were incorporated into each deletion strain)  
72 library. Such strategy also faces problems when trying to apply to broader spectrum of  
73 microorganisms, because recombineering system is only established in a limited number of  
74 microorganisms. To address these issues, we need a novel platform for high-throughput pooled  
75 functional genomics analysis in microorganisms, where the molecular mechanism should be  
76 general to as many hosts as possible, the library should be tailored made to either genome-wide  
77 or focused gene set and the bias issue should be avoided as much as possible.

78

79 Recently developed CRISPR/Cas9 technology can be used for versatile genome editing guided  
80 by a programmed sgRNA in many organisms(7–11). Efforts along this line has resulted in  
81 many sgRNA libraries to induce genome-wide gene knockout(12–14), knockdown(15, 16) and  
82 activation(15, 17) for functional genomics screens. However, to the best of our knowledge, all  
83 of these works have so far focused on eukaryotic organisms, especially in mammalian cell  
84 lines. Compared with abovementioned pooled functional genomics platforms for  
85 microorganisms that have been previously established, CRISPR/Cas9 system provides several  
86 advantages. Firstly, CRISPR/(d)Cas9 activity has been confirmed in diverse prokaryotes(16,  
87 18–23) and thus provides a more broadly adopted platform than recombineering. Secondly, the  
88 target-specificity-coding region in sgRNA consists of only ~20 nucleotides, compatible with  
89 massively parallel microarray oligonucleotide synthesis and next generation sequencing. This

90 makes it very easy to prepare either the tailor made library for any defined gene set via  
91 microarray oligonucleotide synthesis or the sequencing library using a simple PCR reaction.  
92 Thirdly, because the CRISPRi complex is a recombineering-free *trans*-regulatory element and  
93 sgRNA library is constructed in the plasmid format, such library can be readily transformed  
94 into any number of hosts with different genetic backgrounds in a relatively more unbiased  
95 manner.

96

97 Considering these advantages and the absence of its application in the field of high-throughput  
98 pooled functional genomics in prokaryotes, we sought to establish CRISPR interference  
99 (CRISPRi) system, a CRISPR/Cas9 derivative using a nuclease-activity-free Cas9 mutant  
100 protein to repress transcription, as a pooled functional genomics study platform in prokaryotic  
101 organisms. It should be noted that the fundamental differences between eukaryotic and  
102 prokaryotic genomes as well as their transcription regulation(24) increase the risk to directly  
103 applying the rules drawn from previous eukaryotic library design as well as screen experience  
104 to bacteria or archaea. For example, chromatin accessibility and nucleosome occupancy, which  
105 are unique structures in eukaryotic genomes(25), were found to have significant impact on  
106 sgRNA activity(26–28). On the other hand, in current CRISPRi sgRNA library design  
107 guideline in eukaryotic cells, the target site is selected around the transcription start site  
108 (TSS)(26). However, many genes in prokaryotic genomes are organized in operons

109 co-transcribed as polycistronic mRNA, where a common promoter drives the transcription of  
110 all these genes. In these cases, directing CRISPRi complex to the promoter region is expected  
111 to repress the transcription of the whole operon, rendering the method fail to identify the  
112 contributing individual gene responsible for the studied phenotype.

113

114 To address these issues, informed by existing knockout-phenotype data, we designed a  
115 synthetic sgRNA library consisting of 3,148 sgRNAs (including 400 control sgRNAs)  
116 targeting 67 genes with known phenotype and performed a proof-of-concept screen in *E. coli*.  
117 Facing the genome structure difference for prokaryotes, we designed our library by targeting  
118 CRISPRi complex to open reading frame (ORF) rather than more popular TSS, thus to better  
119 investigate the responses of multiple genes in an operon. Following selection under two  
120 different conditions (minimal and acidic medium), we identified most of the known  
121 gene-phenotype associations, suggesting that this platform provides both high specificity and  
122 sensitivity in a high-throughput manner. For operon structures in *E. coli* genome, our results  
123 showed that by checking the sgRNA abundance profiles targeting the ORF region of every  
124 gene, rather than the common promoter of the particular operon, it is possible to narrow down  
125 the number of candidate genes contributing to the phenotypic effect. Moreover, we extracted  
126 several new rules for sgRNA library design for such pooled functional genomics screen by  
127 exploring the comprehensive sgRNA activity dataset produced from the screens. One

128 interesting observation was that only sgRNAs targeting the first 5% of ORF showed enhanced  
129 repression activity. Additionally, we established that ten sgRNAs per gene were enough for  
130 robust hit-gene identification by computational subsampling. Finally, we optimized the  
131 hit-gene calling algorithm by only recruiting sgRNAs with better activities. This work  
132 established that CRISPRi based pooled screen can be a powerful platform for high-throughput  
133 functional genomics study in prokaryotes.

134

## 135 **Results**

136

### 137 **Design of sgRNA library and CRISPRi screen system**

138

139 To test whether CRISPRi-based pooled screen can be applied to *E. coli*, we wanted to design an  
140 sgRNA library targeting genes for which a knockout produces a known and easily selectable  
141 phenotype, such as a change in growth under specific cultivation conditions. To this end, we  
142 turned to the Keio library(29), an exhaustive *E. coli* gene knockout collection with extensive  
143 phenotypic characterization. Gene knockouts with significant impacts on growth in acidic  
144 medium were extracted from the dataset reported by Nichols et al(30), and auxotrophic gene  
145 knockouts in MOPS medium ( $OD_{600} < 0.1$  after growth for 24 and 48 h in MOPS medium)  
146 were identified from the original paper describing the Keio library(29). All genes thus



147 identified were cross-checked to verify normal growth in LB broth(29). To determine whether  
148 dense coverage of sgRNAs in multiple genes belonging to one operon can be used to assess  
149 genotype-phenotype associations at higher resolution, we used the RegulonDB database(31) to  
150 check the operon structure of the selected genes.

151

152 Using these lines, we selected genes transcribed as monocistronic mRNAs with impaired  
153 growth in MOPS medium to generate Library I, which consisted of 22 candidates. We also  
154 selected a series of genes residing in operons transcribed as polycistronic mRNAs carrying  
155 auxotrophy in MOPS medium, as well as all their co-transcribed partner genes without relevant  
156 phenotypes, to generate Library II, which consisted of 22 genes from nine operons with one  
157 auxotrophic gene per operon. Furthermore, we selected genes with impaired growth in acidic  
158 medium (indicated by a change in colony size on agar plates)(30) to produce Library III, which  
159 consisted of 23 genes. Genes in all three libraries are listed in Table S1. Libraries I and II were  
160 used as a proof-of-concept for CRISPRi-based pooled screen for lethal phenotypes. In contrast,  
161 Library III was used to show the power of pooled screen to confirm moderate  
162 phenotype-associated genes with either positive or negative growth effects.

163

164 A customized python script was developed to design up to 50 sgRNAs for each gene from the  
165 start codon in the open reading frame (ORF) targeting the non-template strand, due to the better

166 activity than template strand as reported previously(16), generating sgRNA Libraries I, II and  
167 III. A negative control sgRNA library (Library NC) was also designed, consisting of 400  
168 N20NG(A)G 23mers with at least five mismatches from any site in the *E. coli* genome. All  
169 designed sgRNAs are listed in Table S2, and basic statistics for the sgRNA library are  
170 presented in Table 1. The sgRNA library was synthesized by DNA microarray and  
171 incorporated into the pTargetF\_lac expression vector by Golden Gate Assembly(32).

172

173 For the CRISPRi system, we used a constitutively expressed dCas9 protein (J23111 promoter)  
174 and the leaky expression of sgRNA from a  $P_{L-lacO}$  promoter (Figure S1a) after several rounds of  
175 optimization (see Methods). The activity of this system was then tested in diverse constructs  
176 targeting *sfGFP* (integrated at the *smf* locus) (Figure S1b), *crtE* (integrated at the *ldhA* locus) in  
177 the lycopene biosynthesis pathway (Figure S1c) and *sacB* (integrated at the *smf* locus) with  
178 cellular toxicity in the presence of sucrose (Figure S1d). Our results confirmed that this system  
179 could be applied to repress gene expression from diverse loci in the *E. coli* chromosome. To  
180 confirm the impact of gene knockdown on cell growth, we individually constructed a series of  
181 sgRNAs from Library I or II, transformed the plasmids into *E. coli* MCm carrying  
182 pdCas9-J23111, and measured growth curves in selective medium (MOPS, Figure S2). Our  
183 results show that the majority of sgRNAs, together with dCas9 protein, significantly impaired  
184 growth compared to the negative control sgRNAs, indicating that CRISPRi-derived repression

185 can provide sustained phenotypic effects to be detected by pooled screen in a high-throughput  
186 manner.

187

188 With sgRNA libraries and the CRISPRi system in hand, pooled screen for high-throughput  
189 functional genomics in *E. coli* was performed, as shown in Figure 1. *E. coli* MCm, a K12  
190 MG1655 derivative with a chloramphenicol-resistance cassette integrated (see Methods) was  
191 chosen as the host cell in this work, considering that the chloramphenicol marker can be used to  
192 detect contamination. The sgRNA library plasmids were prepared and transformed by  
193 electroporation into *E. coli* MCm carrying pdCas9-J23111, giving rise to four cell libraries  
194 (designated I, II, III and NC, according to the relevant sgRNA library). The cell libraries were  
195 then mixed and subjected to relevant selection conditions. The change (selective vs. control  
196 conditions) in relative abundance of each sgRNA (sgRNA fitness) was resolved via deep  
197 sequencing. Based on the information of sgRNA fitness belonging to each individual gene, the  
198 quantitative estimation of genotype-phenotype association (median sgRNA fitness) was  
199 calculated and the statistical significance was determined by comparison with negative control  
200 sgRNAs.

201

202 **Identification of genes with expected auxotrophic phenotypes from pooled screen**

203

204 Cell libraries I, II and NC were combined for selection in minimal medium (MOPS) and  
205 constituted the ‘Minimal Library’. Two biological replicates were included for each selection  
206 condition. A pooled screen approach (Figure S3) was applied, with approximately ten cell  
207 doublings ( $OD_{600}$  from 0.001 to ~1.0; 6.5 h for control while 24.2 h for selective condition), in  
208 principle enabling two-fold enrichment or dilution for mutants with as little as 7% fitness  
209 change per generation. After selection, plasmids were extracted, sequencing libraries were  
210 constructed and deep sequencing was carried out. For all libraries, ~80% of reads were mapped  
211 back to the synthetic sgRNA library (Figure S4), suggesting that the sequencing procedure was  
212 sufficiently reliable. Obvious selection pressure was observed for libraries under selective  
213 conditions, as determined by evaluating library Gini indexes before and after selection (Figure  
214 S4). The consistency of data from two biological replicates was also confirmed in terms of  
215 normalized sgRNA read number (Figure S5).

216

217 We used the relative change in abundance of each sgRNA (*rho* score, a quantitative estimation  
218 for sgRNA fitness, proportional to the relative change of sgRNA abundance; see Methods)  
219 between selective and control conditions to deduce the impact of sgRNA on growth via  
220 repressed gene expression. All processing data (*rho* and Z scores for each sgRNA) for Minimal  
221 Library selection is reported in Table S3. The *rho* score profile for sgRNAs targeting genes  
222 with auxotrophic phenotypes in MOPS medium diverged significantly from the profile for the

223 negative control set (Figure 2a, Figure S6). To determine statistical significance, we applied  
224 the Mann-Whitney U test(33) for comparison between *rho* score distributions of sgRNAs  
225 targeting a given gene and the control sgRNA set, leading to *P* value evaluations of the  
226 phenotypic impact of each gene (Figure 2b, Figure S6). In addition, to perform multiple testing  
227 corrections, ‘quasi genes’ were constructed from the control sgRNA set, and the false  
228 discovery rate (FDR) was measured for different *P* value thresholds as well as a variety of  
229 sgRNA numbers (Figure S7). This analysis showed that sgRNA number does not significantly  
230 impact the profile of FDR curves, and that FDR reached ~1% with a *P* value threshold of 0.01.  
231 Hence, a *P* value of 0.01 was used as the threshold to call statistically significant  
232 genotype-phenotype relationships in the subsequent work, unless otherwise indicated. Using  
233 this threshold, we found that the majority (16/22) of genes from Library I that are auxotrophic  
234 in MOPS medium could be recovered (Figure 2b). Meanwhile, only one gene unrelated to  
235 auxotrophy in Library II had a significant *P* value (Figure 2b), giving a false positive rate (1/13)  
236 that was similar to the FDR determined by multiple testing correction (~1% with 0.01 *P* value  
237 threshold). These results demonstrate that our approach is not only highly sensitive, but also  
238 highly specific for high-throughput genotype-phenotype association.

239

240 We next sought to determine the mechanism behind several false negative results in screen.

241 Intriguingly, among false negative genes in Library I, genes in the arginine biosynthesis

242 pathway (*argA*, *argE* and *argG*) were significantly enriched ( $P = 0.0065$  by one-sided Fisher's  
243 exact test). However, pure culture growth tests showed that representative sgRNAs targeting  
244 these three genes, together with dCas9 protein, significantly blocked cell growth (Figure S2). A  
245 search of the EcoCyc database revealed that ten arginine transporters are encoded in the *E. coli*  
246 genome, suggesting that strains with normal arginine metabolism rescued the growth of  
247 arginine auxotrophic mutants by intermediate cross-feeding in the consortium during screen.  
248 To test this hypothesis, we cultivated wild-type *E. coli* (pdCas9-J23111+ control sgRNA  
249 plasmid) in MOPS medium for 24 h and recovered the supernatant medium by centrifugation  
250 and filter-sterilization. We verified that there was no growth in this sterilized medium without a  
251 seed culture. Then, we mixed this sterilized medium with fresh MOPS medium in a series of  
252 proportions and used this for growth tests (Figure S8). We found that a 1:1 (v/v) mixture  
253 enabled growth of a series of gene-knockdown strains, including those for *argA*, *argE* and  
254 another false negative gene identified in the screen, *lysA*. It is noteworthy that this syntrophic  
255 exchange experiment only partly mimicked the pooled screens. Differences did exist such as  
256 the availability amount and timing of key exchanging intermediate(s) between these two  
257 experimental settings, which could result in some inconsistent results such as the recovered  
258 growth of true positive *cysG* identified in pooled screen and failure to restore the growth of  
259 *argG* knockdown (false negative in pooled screen). Even though, this result strongly suggests  
260 that cross-feeding masks the growth deficit of auxotrophic mutants in the consortium, a

261 reasonable but commonly underestimated pitfall of pooled screens, although further  
262 investigation is needed to determine the specific contributing metabolite(s). In this sense, these  
263 genes are not true false negatives because inherently they cannot be identified as hit for the  
264 phenotype in a pooled screen format. As a supporting evidence, a paper reporting a synthetic *E.*  
265 *coli* co-culture system also indicated such possibility by observing similar syntrophic exchange  
266 phenomena between arginine auxotrophs and several other amino acid auxotrophic  
267 mutants(34).

268

#### 269 **Gene-phenotype association in operons with polycistronic mRNA transcribed**

270

271 We hypothesized that by checking sgRNA fitness profiles for the genes within the same  
272 polycistronic-mRNA-transcribing operon using data from pooled screen, it is possible to  
273 narrow down the candidate gene pool responsible to the studied phenotype (auxotrophy in  
274 MOPS medium in this case). For example, according to the current CRISPRi working model as  
275 a transcriptional roadblock indicated by RNA polymerase nascent RNA sequencing results(16),  
276 if the functionally responsible gene locates at the 3' downstream or middle of the operon, all  
277 other genes upstream of this one in the operon should exhibit perturbed sgRNA fitness profile  
278 (Figure S9, upper and middle panel), because the repression of these genes by CRISPRi also  
279 cause knockdown of downstream target gene. In contrast, if the functionally responsible gene

280 locates at the upstream of the operon, only this gene is expected to be identified as hit while all  
281 others downstream not (Figure S9, lower panel).

282

283 To test this hypothesis, screen data from Library II was assessed. There are nine operons with  
284 polycistronic mRNA transcribed in Library II (Table S1). Among five of them (*nirBDC\_cysG*,  
285 *glnALG*, *serB\_radA\_nadR*, *nadA\_pnuC*, *aroF\_tyrA*), genes with known growth impairment  
286 phenotypes were identified as hits (gave  $P < 0.01$ , Mann-Whitney U test) with negative median  
287 sgRNA *rho* scores, suggesting successful functional association in these cases (sensitivity =  
288 5/9, Figure 2b, 3). Including these five operons, *serB\_radA\_nadR* and *nadA\_pnuC*, where the  
289 auxotrophic genes both reside at the upstream of the particular operon, followed the expected  
290 sgRNA fitness profile (as elucidated in Figure S9, lower panel). Among the three remaining  
291 operons, in spite of successful functional gene mapping, sgRNA fitness profiles partly different  
292 from our hypothesis were observed. For *nirBDC\_cysG* and *aroF\_tyrA*, due to the location of  
293 auxotrophic genes at the 3' downstream of the operon, it is expected that all genes in the  
294 relevant operons should carry perturbed sgRNA fitness profile (Figure S9, upper panel).  
295 However, we surprisingly found that only *cysG* and *tyrA* exhibited reduced sgRNA abundance.  
296 One possible reason for this conflict with known CRISPRi working mechanism is that activity  
297 from unknown promoters drives downstream gene (*cysG* and *tyrA* in this case) expression,  
298 which would not be repressed by *trans*-elements regulating upstream gene expression. For



299 instance, *cysG* has two known promoters right upstream of its coding region (*cysGp1*, *cysGp2*,  
300 RegulonDB). For *aroF\_tyrA* operon, diverse transcript profiles have been described in this  
301 operon. RNA-seq data in RegulonDB (but not determined experimentally) suggested the  
302 existence of TSS\_2941 promoter, residing in the *tryA* ORF region of the *aroF-tyrA* operon.  
303 However, another recent RNA-seq experiment only identified the known *aroFp* promoter(35).  
304 Additionally, in *glnALG* operon, *glnL*, in spite of moderate statistical significance and  
305 unexpected positive median sgRNA *rho* score, was identified as hit in pooled screen. However,  
306 according to the pattern of gene location in this operon (Figure S9, lower panel), only *glnA*, the  
307 gene functionally related to auxotroph at the upstream of the operon, should be identified as hit.  
308 The molecular mechanism for this phenomena might be due to the reverse polar effect  
309 suggested in a previous work(23), where the repression of downstream *gfp* in an artificial  
310 *rfp-gfp* operon by CRISPRi unexpectedly gave rise to the perturbation of upstream *rfp*  
311 expression. The relatively weak property of reverse polar effect(23) is also consistent with our  
312 observation that *glnL* only exhibited moderate association with auxotrophy.  
313  
314 For the other four operons (*fic\_pabA*, *pyrBI*, *rsmE\_gshB*, *kbaZ\_agaV*), no genes showed  
315 significant changes in sgRNA *rho* score profiles, except for *pabA* with a positive median  
316 sgRNA *rho* score but only minor statistical significance (thus a false positive as defined in  
317 Methods). The expected phenotype-determining genes include *pabA*, *pyrB*, *rsmE* and *agaV*.

318 One reason for the false negative result of *pabA* and *pyrB* might be poor CRISPRi-based  
319 repression. We reconstructed two sgRNAs targeting these two genes and determined the  
320 growth profile in MOPS medium. We failed to observe any difference from the control group  
321 (Figure S10). For *rsmE* and *agaV*, knockouts result in only moderately impaired fitness in  
322 MOPS medium(29). Although the *rsmE* knockout mutant is defective compared to the  
323 wild-type strain(36), such a moderate difference in fitness might only be detectable with  
324 prolonged selection time (currently, ten doublings) or more stringent selection pressure. It is  
325 very interesting to observe a much higher false negative rate (4/9) for operons with  
326 polycistronic mRNA, in contrast to coping with operons with single gene (6/22). This result  
327 suggested the complexity of coordinated transcription of polycistronic-mRNA operons and  
328 unknown interaction of such complexity with CRISPRi function.

329

### 330 **CRISPRi screen for robust identification of moderate-phenotype-associated genes**

331

332 To explore the capacity of CRISPRi-based pooled screen to map genes to moderate phenotypic  
333 effects, we combined cell Libraries III and NC as a ‘LowpH Library’ and subjected it to  
334 selection in acidic medium (LB4.5 medium, see Methods). We applied a pooled screen  
335 approach (Figure S3) with approximately five cell doublings ( $OD_{600}$  from 0.01 to ~0.4; 2.3 h  
336 for control while 9.0 h for selective conditions), enabling two-fold enrichment or dilution for

337 mutants with as little as 15% fitness change per generation. All processing data (*rho* and Z  
338 scores of each sgRNA) for LowpH Library selection is reported in Table S4. As in the Minimal  
339 Library screen, the mapping ratio, selection pressure (Figure S11) and biological replicate  
340 consistency (Figure S12) were acceptable. We also evaluated the FDR curve by constructing  
341 quasi-genes from the negative control sgRNA set (Figure S13). We applied a 5% FDR (fit by  
342 interpolation from data in Figure S13) as the threshold for hit-gene calling and found that a  
343 significant fraction (9/23) of known growth-perturbing mutants in acidic medium can be  
344 recovered by pooled screen (Figure 4). The false negative results observed might be due to the  
345 systematic difference between physiological responses to acidic stress in liquid medium (this  
346 work) and on agar plates (dataset used to extract genes in library III)(30). This result shows that  
347 our method is a powerful tool for constructing gene-fitness maps when gene expression  
348 perturbation has only a moderate impact on growth (the majority of median *rho* score absolute  
349 values were less than 0.02, whereas those of more than half of the true positives in the Minimal  
350 Library were higher than 0.05; Figure 2b).

351

## 352 **Overview of sgRNA activity landscape across ORF**

353

354 With the dataset produced in abovementioned screen, we sought to further address the sgRNA  
355 activity issue, because we observed in our dataset great sgRNA activity diversity (Figure 2a),

356 as reported in previous work(cite). We firstly checked the effect of sgRNA location within  
357 ORF, an important feature found to determine sgRNA activity in CRISPRi system(16) but only  
358 assessed by case study rather than big data thus far. To this end, we combined sgRNAs from  
359 Library I whose corresponding genes are shown to be true positives, thus constructing a  
360 ‘functional’ sgRNA set (16/22 genes, 468 sgRNAs; Figure 2b). The absolute values of sgRNA  
361 Z scores (see Methods) are a reasonable metric to evaluate their activities. We categorized  
362 sgRNAs in this set into subgroups according to their relative position along the ORF. We then  
363 examined the difference in activity between each subgroup and the whole population using the  
364 Mann-Whitney U test (Figure 5). We observed that only the sgRNA subgroup located within  
365 the first 5% of the ORF region exhibited enhanced activity ( $P = 0.0030$ , threshold  $P < 0.01$ ),  
366 whereas all other subgroups did not. This was consistent with previous reports indicating that  
367 sgRNAs targeting upstream regions of the ORFs exhibited better activity(16). Our results,  
368 which are based on comprehensive big-data analyses, define this optimal window for active  
369 sgRNA positioning with better resolution compared with previous works. It should be noted  
370 that this dataset is highly noisy due to the functional consequences of gene knockdown are  
371 inherently diverse across genes. Considering the importance to select highly active sgRNAs  
372 incorporated into the library, we suggested the need to develop more unbiased strategy to  
373 differentiate the knockdown activity of sgRNAs(37), enabling better design of synthetic  
374 sgRNA libraries.

375

376 **Number of sgRNAs per gene needed for robust gene calling**

377

378 Reducing the number of sgRNAs per gene is expected to reduce the cost of library preparation  
379 and facilitate handling in large-scale experiments. In order to determine the minimal sgRNA  
380 set needed for reliable hit-gene calling, we performed a subsampling approach based on  
381 sgRNAs targeting the true positive genes in Library I (16/22 genes, 545 sgRNAs) collected  
382 from Minimal Library screen. Five strategies were tested to determine the priority of sgRNA  
383 selection during subsampling: ‘Position’, ‘Random’, ‘RS2’, ‘Cas9cal’ and ‘SSC’. The Position  
384 strategy chooses the sgRNA set most proximal to the start codon of the ORF, where more  
385 activity can be expected (Figure 5). The Random method selects sgRNAs randomly during  
386 subsampling. Cas9cal(38), RS2(27) and SSC(39) determine sgRNA subsampling priority  
387 based on scores given by a previously reported sequence-activity machine learning model. For  
388 SSC, we chose a model specially trained from eukaryotic CRISPRi data. For Cas9cal, we used  
389 a hybrid model of dCas9 binding and Cas9 cleavage activity. In contrast, RS2 was trained  
390 exclusively from CRISPR/Cas9-induced DNA cleavage-based loss-of-function screen data.  
391 We made a hypothesis here that sgRNA activities in CRISPR/Cas9 system, to a certain extent,  
392 positively related to the activities in CRISPRi system.

393

394 We subsampled sgRNAs for each gene based on these five strategies and then calculated the  $P$   
395 value in comparison to the 400-member control sgRNA set by the Mann-Whitney U test  
396 (Figure 6). We found that the Position method generally outperformed all others, especially  
397 when only a minimal sgRNA set was available. For instance, when 5 sgRNAs were available,  
398 except for Position method, all other subsampling approaches resulted in a big portion of genes  
399 identified as false negative due to the  $P$  value below the threshold (Figure 6, below the dashed  
400 line). The differences among the five methods became smaller when more sgRNAs were  
401 sampled. When the sgRNA subset reached ten members, nearly all genes reached the  
402 significance threshold using the Position subsampling strategy ( $P < 0.01$  for 14/16 genes,  
403 giving FDR  $\sim 0.01$ , as shown in Figure S7;  $P < 0.05$  for remaining two genes). This suggests  
404 that ten sgRNAs per gene is sufficient for robust functional genomics screen, at least under our  
405 selection scenario.

406

#### 407 **Optimization of gene-calling algorithm**

408

409 Contrary to our expectation, during Position-based sgRNA subsampling, we found that a  
410 subset of sgRNAs occasionally resulted in stronger statistical significance than all available  
411 sgRNAs. Figure S14 presents the subsampling profiles for four representative genes. For *purC*  
412 and *purM*, the main sgRNA contributing to gene detection resides at the 5' region of the ORF,

413 suggesting that a more complete knockdown is necessary to impair cell growth. In contrast, for  
414 *gltA* (a strong hit-gene encoding citrate synthase) and *cysB* (a weak hit-gene regulating cysteine  
415 biosynthesis and sulfur metabolism), the statistical significance generally increased as more  
416 sgRNAs were tested. This phenomenon indicates that even partial knockdown of gene  
417 expression lead to an observed phenotype in these cases. This observation reveals that the  
418 efficiency of CRISPRi-based screen relies on multiple factors. When a significant change in  
419 gene activity is needed to cause a phenotype, sgRNA activity is the dominant contributing  
420 factor in statistical significance. In contrast, when moderate perturbation of gene expression is  
421 sufficient, sgRNA number is the dominant factor.

422

423 Based on these observations, we hypothesized that a properly selected subset of sgRNAs  
424 belonging to a gene might give stronger statistical significance than the intact set. Hence, we  
425 tried to optimize the hit-gene calling algorithm by applying the Position strategy to subsample  
426 the sgRNA set and searching for the peak of statistical significance (by Mann-Whitney U test)  
427 with at least five sgRNAs to ensure robustness (Figure S15). We compared the performance of  
428 this novel strategy with the previous version as a reference for hit-gene calling in the Minimal  
429 Library screen dataset (Figure S16). We used only the first 15 sgRNAs at the 5' region of the  
430 ORF to assess the capacity of the new algorithm to identify hit genes with fewer sgRNAs. The  
431 optimized approach maintained the performance of hit-gene calling (compared with Figure 2b)

432 with fewer sgRNAs, and improved the statistical significance of hit-gene calling for a subset of  
433 genes (*purC*, *purL*, *purM* and *nadA*), all of which have a typical sgRNA subsampling profile  
434 with a statistical significance peak between 5 and 15 sgRNAs. This optimized strategy also  
435 maintained performance in determining genotype-phenotype associations in complex  
436 co-transcriptional units (Figure S17 vs. Figure 3 produced by previous gene-calling algorithm  
437 with all available sgRNAs). To evaluate the robustness of the new algorithm applied to  
438 moderate phenotype mapping, we repeated the pipeline using only the first 15 sgRNAs most  
439 proximal to the start codon of relevant genes in Library III. We applied a 5% FDR threshold (fit  
440 by interpolation from data in Figure S13) and identified eight positive hit-genes among all 23  
441 candidates in this dataset (Figure S18), six of which were originally identified as hits by the  
442 previous program with all available sgRNAs (Figure 4). This demonstrates both the reliability  
443 and improvement (two additional hits with a smaller sgRNA set) of the optimized algorithm.

444

## 445 **Discussions**

446

447 This work, for the first time in prokaryotic organisms, presents a novel high-throughput  
448 functional genomics platform enabled by CRISPRi pooled screen. Our data supports that this  
449 method is both highly sensitive (16/22 coping with genes transcribed as monocistronic  
450 mRNA, while 9/23 for genes with moderate phenotypic effect as demonstrated in acidic



451 medium selection) and specific (at least < 5% FDR). Importantly, our library design considers  
452 the unique genome structure of prokaryotic organisms such as that we target sgRNAs to ORF  
453 rather than regions around TSS, which is widely adopted in eukaryotic sgRNA library design  
454 for CRISPRi screen. This feature, at functional level, enables us to investigate the sgRNA  
455 fitness profile of each individual gene in polycistronic-mRNA transcribing operons, thus  
456 narrowing down the candidate gene pool for the studied phenotype (successful in 5 of 9 cases).  
457  
458 CRISPRi technology provides new opportunities and advantages for high-throughput  
459 functional genomics in prokaryotic cells, compared with several other established pooled  
460 screen methods based on transposon gene knockout(1, 5) or recombineering(3), in terms of  
461 better applicability to more microorganisms, customized library design, easier preparation and  
462 handling of library as well as less bias problem. Indeed, highly efficient recombineering toolkit  
463 is only available to several model bacterial strains with either clinical or industrial importance  
464 after decades of mining and optimization(40–43), since its introduction nearly 20 years  
465 ago(41). In contrast, only a working expression system is needed for CRISPRi based functional  
466 genomics platform to be established in a new prokaryotic organism, and this system has been  
467 shown to be broadly applicable from prokaryotic(7, 20–23) to eukaryotic(8–11) cells in the  
468 recent four years. In the aspect of bias issue, a benchmark work constructing a comprehensive  
469 transposon mutant library in *Burkholderia thailandensis* presented 86.7% coverage for 5,634

470 predicted genes after optimizations(44), given that 7.1% of all genes as putatively  
471 essential(45). In our case, we achieved > 99.5% coverage as well as 88.1% 10-fold variation in  
472 the prepared library for the designed sgRNA set in this work. Moreover, these parameters were  
473 maintained for a genome-wide sgRNA library targeting > 4,000 genes in *E. coli* without dCas9  
474 expression (unpublished data). This highly even distribution of mutant abundances and the  
475 customized library design make it possible to study the functions of focused gene set with short  
476 coding length, such as (a)sRNAs, which have been shown to play important roles in the  
477 responses to environmental changes in prokaryotic organisms(46, 47). In fact, strategies  
478 applying CRISPR/(d)Cas9 method for high-throughput non-coding RNA functional profiling  
479 have been recently reported in the human genome screen(48, 49). During the preparation of our  
480 manuscript, a report described a genetic mapping analysis via pooled screen and deep  
481 sequencing based on CRISPR/Cas9-facilitated recombineering in *E. coli* (CREATE)(50).  
482 Although CREATE is a very powerful platform, it suffers from inherent variability in  
483 recombination efficiency across genomes (like the TRMR approach(6)), which can cause  
484 problems in downstream data analysis. Hence, our method provides the first proof-of-concept  
485 of CRISPR/(d)Cas9 based high-throughput functional genomics in prokaryotic genetics at  
486 gene level, in contrast to CREATE focusing at nucleotide level. Except for the advantages  
487 presented in this work, our proof-of-concept method still suffers from shortcomings such as  
488 inability to induce gene overexpression or expression level modulation, which is important to

489 more comprehensively profile a genome as shown in other platforms(6, 51). However, the  
490 versatility of CRISPR/(d)Cas9 based system have been extensively demonstrated(17, 52).  
491 Further works need to be carried out to realize these potentials for more powerful functional  
492 genomic screen in prokaryotes.

493

494 This work presents the first guideline learned from the big-data for the construction of sgRNA  
495 libraries for CRISPRi pooled screen towards identifying genes important for particular  
496 phenotypes in prokaryotes. For example, we successfully identified the optimal window for  
497 highly active sgRNAs at the first 5% of ORF region. Meanwhile, the low false positive rate of  
498 our screen result suggests that sgRNA off-target effect based on current cutoff setting is  
499 minimal, especially considering the fact that typical prokaryotic genome is much smaller than  
500 that of mammalian cells. We also suggested 10 sgRNAs per gene in library design by  
501 computational subsampling analysis. Currently, most of the sgRNA design tools focus  
502 specially on eukaryotic organism, such as human or mouse cells(27, 53). Fewer available tools  
503 addressing the usage of CRISPR system in prokaryotes also basically depend on the rules for  
504 eukaryotic organisms. For example, in CRISPR-ERA(54), a popular webserver able to provide  
505 batch sgRNA design for genome editing and repression for *E. coli* and *B.subtilis*, the only rule  
506 regarding sgRNA efficacy is their position within a optimal window 500bp downstream of the  
507 TSS, which does not consider important features for CRISPRi usage in prokaryotes such as

508 operon structure (targeting around TSS generally represses the transcription of the operon),  
509 strand (targeting non template strand was shown to have higher CRISPRi activity(16)) and the  
510 position-activity relation for sgRNA activity (Figure 5, in another aspect, for prokaryotic gene  
511 without any intron, 500bp sometimes covers the whole gene-coding region). This work  
512 presented the preliminary solutions of these issues via the abovementioned library design  
513 guideline. We are also working to produce bigger dataset to train models and construct  
514 user-friendly software packages, aiming at providing with the community currently  
515 unavailable tools to design better sgRNA (libraries) in prokaryotes.

516

517 For polycistronic-mRNA-transcribing operons, a very common organization of prokaryotic  
518 genes in genome ,our approach successfully narrowed down the target gene pool. However, we  
519 also observed exceptions of sgRNA fitness profile patterns at functional level, such as the  
520 absence of gene repression when targeting CRISPRi complex to the upstream genes  
521 (*nirBDC\_cysG* and *aroF\_tyrA*), a potential conflict with known CRISPRi mechanism. One  
522 potential explanation for this phenomenon is the unidentified promoters within the operon, like  
523 *cysGp1* or *2*. Moreover, some recent papers suggested that dCas9-sgRNA complex could bind  
524 ssRNA, in spite of much lower affinity(55–57). Due to our library design to target the  
525 non-template strand, the complex could theoretically bind the corresponding mRNA, thus  
526 independently inhibiting the translation process of each individual coding region within the

527 polycistronic mRNA, which might be an alternative reason for the unexpected sgRNA fitness  
528 profile pattern mentioned above. Because of the general existence of operon structure and their  
529 importance at transcription regulation in prokaryotic genomes, further investigation is needed  
530 to more comprehensively understand the potential interactions when applying CRISPRi  
531 technology to operon structures at molecular level. We recommend that CRISPRi-based  
532 arrayed or pooled screen can be used to study the gene expression regulation in operons, as a  
533 complementary method to gene knockout (DNA sequence) and antisense RNA technology  
534 (currently known transcription vs. mRNA stability and protein translation)(58) functioning at a  
535 different level, the combination of which should give us novel insight into the mechanism of  
536 expression regulation in operons, such as the unidentified promoter activities within the operon  
537 suggested by our screen result (Figure 3, *nirBDC\_cysG* and *aroF\_tyrA* operons).

538

539 Another interesting observation is that the performance of the three machine learning models  
540 (Cas9cal, RS2 and SSC) we adopted for sgRNA subsampling is not significantly different from  
541 that of random strategy (Figure 6), and even exhibits poorer performance when less than ten  
542 sgRNAs are available for each gene. Based on current data we cannot rule out the contribution  
543 of the inherent difference in sgRNA activities when regarding CRISPR/Cas9 based DNA  
544 cleavage and CRISPRi based gene repression. However, considering the fact that SSC model  
545 was trained from purely eukaryotic CRISPRi data and the comprehensively reviewed structural

546 differences of eukaryotic and prokaryotic genomes(24), the failure of current models trained  
547 exclusively based on screen data from mammalian cells might be derived from the systematic  
548 difference between *in vivo* sgRNA activities on eukaryotic versus prokaryotic chromosomes.  
549 Indeed, even for eukaryotic cells such as yeast, a recent work identified a different optimal  
550 window relative to TSS for active sgRNA positioning in CRISPRi system compared with  
551 reported in human cell lines(59). Similarly, a recent report also stated the poor prediction of  
552 target activities (CRISPR/Cas9 derived cleavage) in *E. coli* by models trained from eukaryotic  
553 cell screen data(60). Hence, CRISPR/Cas9 or CRISPRi screens need to be performed in  
554 prokaryotic organisms as what have been extensively tested in eukaryotic cells. Such efforts  
555 will not only shed light on the sequence-activity relationship of sgRNAs in this poorly explored  
556 system to guide more efficient genetic engineering and function exploration, but will also more  
557 comprehensively elucidate the working mechanisms of the CRISPR system.

558

559 In summary, we designed, synthesized and screened an sgRNA library based on CRISPRi  
560 technology in *E. coli*, representing the first CRISPR/dCas9-based pooled screen functional  
561 genomics study in a prokaryote. Our results reveal that the synthetic sgRNA library-based  
562 pooled screen provides a powerful tool to facilitate high-throughput microbial genetic studies  
563 (Figure 2, 3 and 4). Moreover, our dataset, based on big-data analysis, revealed several novel  
564 insights for the design of sgRNA libraries for CRISPRi utilization in prokaryotic organisms,

565 such as activity-position relationships (Figure 5) and the poor performance of current activity  
566 prediction models upon our dataset (Figure 6). The lessons learned from this work—including  
567 establishing a threshold of ten sgRNAs per gene for robust hit-gene calling (Figure 6) and  
568 development of an optimized hit-gene calling algorithm (Figure S15~18)—should facilitate  
569 genome-wide sgRNA library design and data parsing for high-throughput functional genomics  
570 studies (using gene knockdown or overexpression(61)) in *E. coli* and other important  
571 prokaryotes.

572

## 573 **Materials and Methods**

574

### 575 **Strains, DNA manipulations and reagents**

576

577 *E. coli* MG1655 (wild type) was obtained from the ATCC (700926). *E. coli* s17-1 sfGFP was a  
578 kind gift of the George Guoqiang Chen laboratory at Tsinghua University(19). All cloning  
579 procedures were performed according to the manufacturers' instructions. DNA purification  
580 (D2500) and isolation of high-quality plasmids (D6943) were performed using reagents from  
581 Omega Bio-Tek (U.S.). DNA restriction and amplification enzymes were from New England  
582 Biolabs. During plasmid construction, *E. coli* DH5a (BioMed) served as the host and was  
583 cultured in Luria-Bertani (LB) broth or on LB-containing agar plates at 37°C. Plasmids were

584 constructed by Gibson assembly with a customized recipe, as described(62). Antibiotic  
585 concentrations for kanamycin, ampicillin and chloramphenicol were 50, 100 and 7 mg/L,  
586 respectively. MOPS medium was prepared as described(63). LB4.5 medium was prepared by  
587 supplementing LB broth with 0.1 mol/L 4-morpholineethanesulfonic acid (Sigma M2933),  
588 adjusting pH to 4.5 using hydrochloric acid, followed by filter sterilization. All cultivation was  
589 carried out at 37°C.

590

### 591 **Strain and plasmid construction**

592

593 All strains, plasmids and primers are listed in Tables S5 and S6. *E. coli* strain MCm used in  
594 library screen was constructed by inserting a chloramphenicol expression cassette cloned from  
595 pKM154(64) (Addgene plasmid #13036) into the *smf* locus of wild-type *E. coli* K12 MG1655  
596 by  $\lambda$ /RED recombineering(41). *E. coli* Msac was constructed by inserting a *sacB* expression  
597 cassette (in which the J23105 promoter drives expression of *sacB* cloned from pKM154(64),  
598 Addgene plasmid #13036) by CRISPR/Cas9 recombineering(65). *E. coli* lyc001 is a  
599 lycopene-overproducing strain created by integrating a heterologously overexpressing *crtEIB*  
600 cluster (cloned from pTrc99a-*crt*-M(66)) into the chromosome (unpublished data). The  
601 nuclease activity-deficient Cas9 mutant dCas9 was derived from the pdCas9-bacteria vector  
602 (Addgene plasmid #44249)(16). The promoter and resistance marker region were replaced



603 with a constitutive promoter (wild-type promoter for Cas9 from *Streptococcus pyogenes*) and  
604 kanamycin marker cloned from pCas (Addgene plasmid # 62225)(65), resulting in  
605 pdCas9-cons. The promoter was replaced by well-characterized iGEM Anderson promoters,  
606 giving rise to plasmids pdCas9-J23(109, 111, 112, 113 and 116). The vector for sgRNA  
607 expression was derived from pTargetF (Addgene plasmid #62226)(65) by replacing the  
608 spectinomycin marker with an ampicillin expression cassette (pTrc99a(67)) lacking the *BsaI*  
609 restriction site. The promoter region was substituted with a synthetic inducible promoter  
610 ( $P_{LlacO-1}$ (68)) together with the corresponding repressor expression cassette *lacI* (pTrc99a(67)),  
611 leading to pTargetF\_lac. To facilitate library (amplified from oligonucleotides synthesized in  
612 DNA microarray) insertion into pTargetF\_lac, pTargetF\_lac\_preLib was constructed by  
613 introducing two *BsaI* sites in opposite directions between the promoter and Cas9-binding site  
614 region of pTargetF\_lac. A series of pTargetF\_lac plasmids targeting different genes was  
615 obtained by inverse PCR with the modified N20 sequence hanging at the 5' ends of primers  
616 followed by self-ligation. To tune the induction profile of the CRISPRi system, we replaced the  
617 native promoter upstream *lacI* with the strong constitutive J23100 promoter and the ribosome  
618 binding site (RBS) with synthetic RBSs designed using RBS calculator(69) (RBS0-4)  
619 presenting enhanced translation intensity (Figure S19, pdCas9-J23116 was used to reduce  
620 dCas9 expression). The  $P_L$  promoter strength was also modulated by introducing mutations to  
621 the -10 motif, as reported(70) (W for wild type, M for mutant).

622

### 623 **Optimization of CRISPRi system**

624

625 To reduce the noise introduced during selection, we aimed to developed a constitutive dCas9  
626 expression plasmid, in contrast to currently reported dCas9 constructs under the control of  
627 inducible promoters in prokaryotes(16, 19, 23, 71). At the same time, we tried to establish  
628 inducible sgRNA expression systems to facilitate manipulation of essential genes (Figure S1a).  
629 To this end, we constructed a series of dCas9 expression plasmids under the control of  
630 constitutive iGEM Anderson promoters with a series of expression strength. We used strong  
631 inducible  $P_{L-lacO}$  promoters with a well-defined transcription start site and tight regulation to  
632 drive sgRNA expression. However, we failed to observe any inducible knockdown activity  
633 owing to expression leakage, and instead found that repression activity was generally  
634 determined by the strength of dCas9 expression (Figure S1b, the repression level is  
635 proportional to the strength of Anderson promoter, J23111 > J23116 > J23109 > J23113 >  
636 J23112), in accordance with the assumption that this system being dCas9-limited and having  
637 sgRNA in abundance. Further optimization of relevant repressor and  $P_L$  promoter expression  
638 strength still failed to produce the expected induction property (Figure S19, pdCas9-J23116  
639 was used to reduce dCas9 expression). These results suggested that a moderate level of sgRNA  
640 expression was sufficient to drive sustained CRISPRi activity, which is consistent with the fact

641 that inducible CRISPR systems developed thus far in prokaryotes have been based on  
642 regulation of dCas9 expression(16, 19, 23, 71) and the vector backbone we used here for  
643 sgRNA expression has a relatively high copy number (pMB1 origin, ~15-20 copies/cell).  
644 Based on the result of dCas9 constructs with diverse expression strength (Figure S1b), we used  
645 the pdCas9-J23111 (the strongest promoter among the five constructs) and pTargetF\_lac  
646 plasmids for the following work, exploiting the leaky expression of sgRNA from the  $P_{L-lacO}$   
647 promoter, as this provides sustained repression activity, enabling further tuning, if required.

648

#### 649 **Characterization of CRISPRi system**

650

651 For fluorescence characterization, overnight LB cultures (ampicillin and kanamycin) from a  
652 single colony of *E. coli* s17-1 sfGFP containing relevant dCas9 and sgRNA (or control sgRNA  
653 without potential target in *E. coli* genome) expression plasmids were individually incubated in  
654 10 mL fresh LB medium in 50-mL flasks (initial  $OD_{600} = 0.02$ ) with or without 1 mM isopropyl  
655  $\beta$ -D-1-thiogalactopyranoside. Subsequently, cells were cultivated for 12 and 26 h, and  
656 fluorescence was measured with an F-2500 Hitachi Fluorescence Reader (excitation, 488 nm;  
657 emission, 510 nm). Fluorescence was normalized to the culture  $OD_{600}$  value measured on an  
658 Amersham Bioscience spectrophotometer. The repression ratio was calculated by comparison  
659 of relative fluorescence to the control strain expressing the non-targeting sgRNA.

660

661 For lycopene accumulation characterization, overnight LB cultures (ampicillin and  
662 kanamycin) from a single colony of *E. coli* lyc001 containing dCas9-J23111 and  
663 pTargetF\_lac\_crtE1/2 (or control sgRNA without potential target in *E. coli* genome) were  
664 individually incubated in 10 mL fresh LB medium in 50-mL flasks (initial OD<sub>600</sub> = 0.02).  
665 Subsequently, fermentation was carried out for 24 h and lycopene was measured as  
666 reported(66). The titer was normalized to the culture OD<sub>600</sub> value.

667

668 For growth testing of *E. coli* Msac, LB agar plates without sodium chloride were prepared by  
669 adding 500 g/L filtering-sterilized sucrose stock solution to autoclaved sodium-chloride-free  
670 LB broth (1.8% agar) until a final concentration of 100 g/L. A single colony of *E. coli* Msac  
671 containing dCas9-J23111 and pTargetF\_lac\_sacB1/2 (or control sgRNA without potential  
672 target in *E. coli* genome) was streaked and cultivated at 30°C for 24 h.

673

#### 674 **Design, synthesis and processing of sgRNA library**

675

676 The genome sequence of NC\_000913.3 was used for library design in *E. coli* K12 MG1655.  
677 Sequences for 20-mers used as sgRNAs were designed by customized python scripts. The  
678 SeqMap package(72) was used to check potential off-target sites of the designed sgRNAs by

679 searching for N20NG(A)G 23-mers in NC\_000913.3 with a tolerance setting of five  
680 mismatches. Customized scoring metrics inferred from previous reports(15, 73) and illustrated  
681 in Figure S20 were designed to evaluate off-target sites identified by SeqMap. Briefly, the  
682 protospacer region was divided into three regions (8, 5 and 7 nt, from 5' end to 3' end as  
683 Region III, II, I, respectively) according to the distance to the protospacer-adjacent motif  
684 (PAM). We set this scoring metrics because mismatches are generally better tolerated at the 5'  
685 end of the 20-nt targeting region of the sgRNA than at the 3' end (proximal to PAM)(74). If the  
686 PAM site of the off-target 23-mer was 'NGG', the mismatch penalty in the abovementioned  
687 three regions was set as 2.5, 4.5 and 8, respectively, and the setting for 'NAG' was 3, 7 and 10,  
688 respectively. The off-target site was considered significant when  $\Sigma(\text{penalty} \times \text{mismatch}) <$   
689 threshold (11 in this work); relevant sgRNAs were eliminated from further processing  
690 accordingly. According to a recent report comprehensively assessing off-target effect of  
691 CRISPRi system via a partially degenerate library of variants(15) where we adopted the  
692 off-target threshold setting from, our metrics can ensure minimal off-target effect. We took a  
693 more stringent off-target cutoff than this previous report(15). For instance, one mismatch in  
694 Region I together with another in Region III were found to completely abolish off-target effect  
695 of CRISPRi induced repression(15). Even such off-target is considered significant  
696 corresponding to  $2.5+8<11$  in our off-target detection rules. The threshold to exclude 20-mers  
697 based on GC content was set at  $<25\%$  or  $>75\%$ (15). For each gene, sgRNAs (N20NGG)

698 meeting the described principles were designed from 5' upstream regions targeting the  
699 non-template strand of the ORF(16) until 50 sgRNAs were extracted (for a small fraction of  
700 genes, less than 50 sgRNAs were designed). The sgRNAs were named after 'gene\_p'  
701 according to the position (p) of the first guanine within the PAM region (NGG) in the ORF  
702 (e.g., rsmE\_9, N20 = GTTCAGGATGATAAATGCGG).

703

704 Based on these principles, we selected 22 genes transcribed as monocistronic mRNA with  
705 impaired growth phenotypes in MOPS medium and designed sgRNAs from them, giving rise  
706 to Library I. In addition, we selected a series of genes residing in  
707 polycistronic-mRNA-transcribing operons with impaired growth phenotypes in MOPS  
708 medium, as well as all their co-transcribed partner genes without relevant phenotypic effect,  
709 leading to Library II, which consisted of 22 genes from nine operons with one auxotrophic  
710 gene (MOPS medium) for each operon. Then, 23 genes from either mono- or  
711 polycistronic-mRNA-transcribing operons whose knockouts cause significant growth  
712 perturbation in acidic medium (indicated by a significant change in colony size on agar plates  
713 compared to control) were collected to produce Library III. Finally, 400 negative control  
714 sgRNAs (Library NC) were designed by subsampling random 23-mers with at least five  
715 mismatches to any site (N20N(AorG)G) in the *E. coli* genome with proper GC content  
716 (25–75%). This setting is based on an observation that five mismatches, even all located at the

717 Region III, were enough to completely abolish the sgRNA activity in CRISPRi system(15).  
718 Considering the fact that more off-target sites have mismatches locate in seed (Region II and I)  
719 or PAM region, thus exhibiting even lower activity and the relatively smaller E. coli genome  
720 size (~4.6 Mbp) compared with mammalian cells, this cutoff setting is expected to minimize  
721 the off-target effect.

722

723 It should be noted that there is systematical difference in considering off-target effect of  
724 sgRNA design coping with CRISPR/Cas9 and CRISPRi. As off-targets are already very  
725 unlikely to cause significant perturbation of other genes in CRISPRi, a relatively loose  
726 off-target setting can be tolerated. However, potential off-target sites might introduce double  
727 strand break, giving rise to lethality or gene knockout in CRISPR/Cas9 system. In this case,  
728 more cautious treatment should be considered regarding off-target issue for sgRNA design. In  
729 fact, when we use an alternative version of code described in this work to do at-home sgRNA  
730 design for individual construct used in CRISPRi or CRISPR/Cas9 system, a more stringent  
731 off-target threshold (20) is used, because sgRNA number is not that important in individual  
732 sgRNA design compared with library design (more sgRNAs provide stronger statistical  
733 power).

734

735 The designed sgRNAs were synthesized as oligomers on an Agilent microarray and  
736 constructed as a plasmid library by Golden Gate Assembly(32) with *BsaI*-digested  
737 pTargetF\_lac\_preLib as the backbone vector. The library plasmids were transformed by  
738 electroporation into *E. coli* MCm carrying the pdCas9-J23111 plasmid. Briefly, *E. coli* MCm  
739 cells containing pdCas9-J23111 were grown in LB at 37°C until an OD<sub>600</sub> of 0.8 was reached.  
740 The flask was then placed on ice and all subsequent steps were performed on ice. The cells  
741 were collected by centrifugation, washed five times in ice-cold deionized water, and  
742 resuspended in 15% glycerol to concentrate them 50-fold. Cells were divided into 400- $\mu$ L  
743 aliquots and transformed with 1  $\mu$ g library plasmid using an Eppendorf 2510 Electroporator  
744 with a pulse of 25 kV cm<sup>-1</sup>. Electroporation was carried out three times for each of the four  
745 sub-libraries. The transformed cells were allowed to recover for 1 h at 37°C, then streaked on  
746 LB agar plates containing kanamycin, ampicillin and chloramphenicol. Plates were incubated  
747 for 12 h at 37°C. The coverage for each sub-library is reported in Table S7. Colonies were  
748 scraped from agar plates in LB medium with relevant antibiotics, washed and resuspended at 6  
749  $\times 10^9$  cells per milliliter. Aliquots of each library were mixed 1:1 (v/v) with 50% (v/v) glycerol,  
750 frozen in liquid nitrogen and stored at -80°C.

751

## 752 **Screen and selection**

753



754 Freezer stocks were inoculated into 50 mL LB medium using  $10^8$  cells for each of the four  
755 libraries. Cells were grown at  $37^\circ\text{C}$  to reach an  $\text{OD}_{600}$  of  $\sim 1$ , then collected by centrifugation  
756 and washed with MOPS medium. Libraries I, II and NC were combined according to the  
757 relative sgRNA number ratio to give the Minimal Library. The LowpH Library was prepared  
758 similarly by combining Library III and NC. These two libraries were used for further selection,  
759 and a fraction of each was mixed 1:1 (v/v) with 50% (v/v) glycerol and stored at  $-80^\circ\text{C}$  as the  
760 initial library until plasmid extraction. Separate cultures of 100 mL MOPS and LB medium  
761 with kanamycin, ampicillin and chloramphenicol were incubated with  $10^8$  cells from the  
762 Minimal Library (two biological replicates each). Similarly, LB and LB4.5 medium with  
763 kanamycin, ampicillin and chloramphenicol were incubated with  $10^9$  cells from the LowpH  
764 Library (also two biological replicates each). Cells were grown at  $37^\circ\text{C}$  to an  $\text{OD}_{600}$  of  $\sim 1$  for  
765 the Minimal Library and 0.4 for the LowpH Library. A 1-mL aliquot of each culture was  
766 centrifuged, washed and resuspended. Cultures were mixed 1:1 (v/v) with 50% (v/v) glycerol,  
767 frozen in liquid nitrogen and stored at  $-80^\circ\text{C}$ .

768

### 769 **Deep sequencing and data processing**

770

771 Frozen cell stocks (Min\_start, Min\_MOPS/LB\_R1/2, LowpH\_start, LowpH\_LB7/4.5\_R1/2;  
772 ten samples; Figure S3) were inoculated into fresh LB medium with kanamycin, ampicillin and

773 chloramphenicol and grown to an OD<sub>600</sub> of ~0.8. The plasmids were extracted and subjected to  
774 gel electrophoresis. The results confirmed the robust maintaining of both dCas9 and sgRNA  
775 expression plasmids (Figure S21). The purified plasmids were used as a template for PCR to  
776 amplify the N20 region of library sgRNAs (for Minimal Library: 50- $\mu$ L reaction, 50 ng  
777 template, PF/R\_pTargetLacNGS\_SE75, Q5 polymerase, NEB M0491L, 98°C 30 s, 20 cycles  
778 [98°C 10 s, 52.4°C 30 s, 72°C 10 s], 72°C 1 min; for LowpH Library: 50- $\mu$ L reaction, 50 ng  
779 template, PF/R\_pTargetLacNGS\_SE50, Q5 polymerase, NEB M0491L, 98°C 30 s, 17 cycles  
780 [98°C 10 s, 53°C 30 s, 72°C 10 s], 72°C 1 min). The sequencing library was prepared following  
781 the standard protocol. High-throughput sequencing (Annoroad Genomics, Beijing, China) was  
782 performed on an Illumina HiSeq 2500 by the single-end 75-bp (SE75) technique for the  
783 Minimal Library, and on an Illumina NextSeq 500 by the SE50 technique for the LowpH  
784 Library. Approximately 10 million reads were collected for each library, providing at least  
785 1,000-fold coverage.

786

787 Customized python scripts were used to extract the 20-mer variable sequences and remove  
788 those with mutations within upstream or downstream regions (2–4 bp each) from raw *.fastq*  
789 files. MAGeCK-VISPR(75) was used for extracted N20 set mapping back to the designed  
790 sgRNA library, general parameter calculation (Gini index and mapping ratio) and library  
791 normalization. To increase statistical robustness, only sgRNAs with >100 reads in the initial

792 library were used for further analysis. Further sgRNA statistics and genotype-phenotype  
793 associations were calculated based on the framework described by Kampmann et al.(33) with  
794 home-made python scripts. Briefly, the averaged read numbers from the two biological  
795 replicates were normalized after MAGeCK-VISPR processing. The *rho* score for each sgRNA  
796 was calculated as presented by the four equations below, suggested by previous work(33).

797

$$N_{NC}^{control}(t) = N_{NC}^{control}(t_0) \times 2^{gt_{control}} \quad (I)$$

798

$$799 \quad N_{NC}^{selective}(t) = N_{NC}^{selective}(t_0) \times 2^{(g-k)t_{selective}} \quad (II)$$

800

$$801 \quad rho'_{sgRNA} = \text{Log}_2 \left( \frac{\text{abundance}_{selective}}{\text{abundance}_{control}} \right) / kt_{selective} \quad (III)$$

802

$$803 \quad rho_{sgRNA} = rho'_{sgRNA} - \text{median}(rho'_{NC \text{ sgRNA}}) \quad (IV)$$

804

805 Firstly, we utilized recorded OD<sub>600</sub> during screen in control condition, together with proportion  
806 of all negative control sgRNAs parsed by sequencing in relevant condition to determine  
807 parameter *g*, referring to growth rate of wild type cells in control condition (Equation I).  
808 Subsequently, *k*, the reduction in growth rate of wild-type cells under selective conditions  
809 compared with standard conditions was determined similarly using data in screen under

810 selective conditions (Equation II). Raw *rho* scores for all sgRNAs were calculated by  
811 determining the relative change of abundance between selective and control conditions, further  
812 normalized by  $k*t$  (Equation III). Finally, *rho* scores for all sgRNAs were further normalized  
813 by the median of raw negative control sgRNA (Equation IV).

814

815 Negative control sgRNA *rho* scores in each condition were fit by normal distribution, giving  
816 rise to the standard deviation ( $\sigma$ ). The Z score for each sgRNA was calculated by normalization  
817 with the  $\sigma$  value for the relevant library. In the original version of the hit-gene calling algorithm,  
818 the *P* value for each gene was derived from a two-tailed Mann-Whitney U test of all sgRNAs  
819 targeting that gene against the non-targeting control set. In the case of Minimal Library screen,  
820 if the median *rho* score of all sgRNAs belonging to the relevant auxotrophy-related gene was  
821 less than 0 (because gene knockdown in this library led to auxotrophy in MOPS medium) and  
822 the Mann-Whitney U test resulted in a *P* value less than the threshold (0.01 *P* value), the gene  
823 was categorized as a ‘true positive’. ‘False positive’ included genes with no auxotrophy by  
824 knockout but significant *P* values, or those ‘true’ auxotrophic genes with significant *P* values  
825 but positive median *rho* scores. ‘False negative’ was used to describe auxotrophic genes with  
826 insignificant *P* values. In the case of LowpH Library screen, a gene was considered significant  
827 when the FDR value of the Mann-Whitney U test was less than threshold (5% FDR). In the  
828 improved version of the algorithm, we subsampled the sgRNA set (adding sgRNAs one by one

829 to calculate  $P$  values) based on relative location within the ORF (from start to stop codon) and  
830 searched for the peak of statistical significance (Mann-Whitney U test  $P$  value), which was  
831 used as the final  $P$  value (or derived FDR). To ensure statistical robustness, at least five  
832 sgRNAs were used for each gene.

833

### 834 **Overview of sgRNA activity landscape across ORF**

835

836 With the dataset produced in abovementioned screen, we sought to further address the sgRNA  
837 activity issue, because we observed in our dataset great sgRNA activity diversity (Figure 2a),  
838 as reported in previous work(26). We firstly checked the effect of sgRNA location within ORF,  
839 an important feature found to determine sgRNA activity in CRISPRi system(16) but only  
840 assessed by case study rather than big data thus far. To this end, we combined sgRNAs from  
841 Library I whose corresponding genes are shown to be true positives, thus constructing a  
842 ‘functional’ sgRNA set (16/22 genes, 468 sgRNAs; Figure 2b). The absolute values of sgRNA  
843 Z scores (see Methods) are a reasonable metric to evaluate their activities. We categorized  
844 sgRNAs in this set into subgroups according to their relative position along the ORF. We then  
845 examined the difference in activity between each subgroup and the whole population using the  
846 Mann-Whitney U test (Figure 5). We observed that only the sgRNA subgroup located within  
847 the first 5% of the ORF region exhibited enhanced activity ( $P = 0.0030$ , threshold  $P < 0.01$ ),

848 whereas all other subgroups did not. This was consistent with previous reports indicating that  
849 sgRNAs targeting upstream regions of the ORFs exhibited better activity(16). Our results,  
850 which are based on comprehensive big-data analyses, define this optimal window for active  
851 sgRNA positioning with better resolution compared with previous works. It should be noted  
852 that this dataset is highly noisy due to the functional consequences of gene knockdown are  
853 inherently diverse across genes. Considering the importance to select highly active sgRNAs  
854 incorporated into the library, we suggested the need to develop more unbiased strategy to  
855 differentiate the knockdown activity of sgRNAs(37), enabling better design of synthetic  
856 sgRNA libraries.

857

### 858 **Subsampling of sgRNA set**

859

860 We computationally subsampled sgRNAs from the available set for one gene using five  
861 priority principles. The Position method checked the location of the sgRNAs along the ORF  
862 and chose sgRNAs whose targets were most proximal to the start codon. For the Random  
863 strategy, ten subsamplings were carried out, and the average of the Mann-Whitney U test  $P$   
864 values was calculated. For the other three approaches, the scripts for three sequence-activity  
865 machine-learning models (Cas9cal(38), RS2(27) and SSC(39)) were downloaded, and the

866 following commands were used to calculate an activity score for each sgRNA, allowing  
867 subsequent selection of the most 'active' candidates.

868

869 `/bin/SSC -l 20 -m SSC0.1/matrix/human_CRISPRi_20bp.matrix -i input.txt -o output.txt`

870 `python rs2_score_calculator_v1.2.py --seq N4N20NGGN3`

871 `python Cas9_Calculator_batch.py crRNAseq PAM target quickmode=False,`

872 `cModelName='All_dataModel.mat'`

873

#### 874 **High-throughput growth curve measurements**

875

876 All strains were grown overnight in deep 24-well plates containing LB medium with ampicillin,

877 kanamycin and chloramphenicol. Cell pellets were collected by centrifugation, washed once

878 with MOPS medium and resuspended. OD<sub>600</sub> values were measured and cells were diluted in

879 fresh MOPS medium with antibiotics at an initial OD<sub>600</sub> of 0.01. Cells were grown with

880 shaking at 37°C in a 96-well plate reader (Tecan 2500 Pro) and OD<sub>600</sub> was measured at 15-min

881 intervals.

882

#### 883 **Statistical information, software and figure generation**

884

885 Plots were generated in Python 2.7 using the matplotlib plotting libraries and plotly online  
886 server (<https://plot.ly/>). Statistical analysis (two-tailed Mann-Whitney U test), data fitting and  
887 interpolation calculation were performed using the SciPy and NumPy Python packages.

888

889

## 890 **Table and Figure Captions**

891

892 Table 1 Basic statistics of the synthetic sgRNA library

|                  | Library I        | Library II              | Library III                          | Library NC       | Total |
|------------------|------------------|-------------------------|--------------------------------------|------------------|-------|
| Number of genes  | 22               | 22                      | 23                                   | 0                | 67    |
| Number of sgRNAs | 976              | 905                     | 867                                  | 400              | 3148  |
| Description      | MOPS-auxotrophic | MOPS-auxotrophic-operon | Growth perturbation in acidic medium | Negative control |       |

893

894 Figure 1 Proof-of-concept demonstration of pooled screen for high-throughput functional  
895 genomics in *E. coli* based on CRISPRi technology. An sgRNA library was synthesized on a  
896 DNA microarray and consisted of four sub-libraries (Library I, II, III and NC). Library I



897 consisted of auxotrophic genes (MOPS medium) transcribed as monocistronic mRNA; Library  
898 II consisted of polycistronic-mRNA-transcribing operons with one auxotrophic gene (MOPS  
899 medium) in each operon; Library III consisted of genes whose knockout results in growth  
900 perturbation in acidic medium; Library NC contains sgRNAs with no target site in the *E. coli*  
901 genome and was used as the negative control in data processing. Oligonucleotides were  
902 amplified and cloned into expression plasmids, which were transformed into *E. coli* expressing  
903 dCas9 protein, resulting in relevant cell libraries. The cell libraries were grown in selective and  
904 control conditions. Plasmids were extracted and deep sequencing libraries were constructed to  
905 resolve the change in abundance of each sgRNA between conditions (sgRNA fitness). The  
906 sgRNA fitness distribution (red histogram) of each gene was compared with that of control  
907 sgRNAs (no target site in the *E. coli* genome; grey histogram) to evaluate the extent to which  
908 this gene was associated with relevant phenotypes (growth perturbation under selective  
909 conditions). This provided estimations of statistical significance ( $P$  value derived from  
910 Mann-Whitney U test) and phenotypic effect (median sgRNA fitness) for each gene.

911

912 Figure 2 Genes that are auxotrophic in MOPS medium can be robustly recovered by  
913 CRISPRi-based pooled screen. (a) Box plot of sgRNA *rho* score distributions for genes in  
914 Libraries I and II. Outliers outside the 1.5-fold interquartile range from the box boundary were  
915 plotted individually (dots). For clarity, only sgRNAs with *rho* scores between -0.4 and 0.4

916 were plotted. (b)  $-\text{Log}_{10}(P \text{ value})$ , where  $P$  values were derived from Mann-Whitney U tests of  
917 sgRNA  $\rho$  scores belonging to the indicated gene against the control sgRNA set. Filled bars  
918 represent genes with auxotrophic phenotypes reported in the Keio collection characterization;  
919 unfilled bars represent genes in Library II for which knockout does not impair growth in MOPS.  
920 Asterisks indicate  $P < 0.01$  ( $-\text{Log}_{10}P > 2$ ); red asterisks indicate false positives with significant  
921  $P$  values, but with unexpected sgRNA median  $\rho$  scores ( $>0$ ) or belonging to the  
922 non-auxotrophic group (see Methods).

923

924 Figure 3 CRISPRi-based pooled screen yielded robust identification of phenotype-associated  
925 genes in polycistronic-mRNA-transcribing operons. Heat maps of  $-\text{Log}_{10}(P \text{ value})$  and median  
926 sgRNA  $\rho$  score are shown for all nine polycistronic operons in Library II. Auxotrophic genes  
927 in MOPS medium are underlined; significant hits ( $P < 0.01$ ,  $-\text{Log}_{10}P > 2$ ) are indicated with  
928 asterisks. Black asterisks are true positive; red asterisks are false positives with significant  $P$   
929 values but have unexpected sgRNA median  $\rho$  scores ( $>0$ ) or belong to the non-auxotrophic  
930 group (see Methods).

931

932 Figure 4 Genes with moderate growth impacts in acidic medium can be reliably recovered by  
933 CRISPRi-based pooled screen. Top: Median sgRNA  $\rho$  score for each gene; bottom:  
934  $-\text{Log}_{10}(P \text{ value})$  derived from Mann-Whitney U tests of sgRNA  $\rho$  scores belonging to one

935 gene against the control sgRNA set. Asterisks indicate genes with  $FDR < 0.05$ . Hit-gene  
936 calling is based on all sgRNAs belonging to one gene against the negative control sgRNA set.

937

938 Figure 5 sgRNAs residing within the first 5% of ORF region were significantly more active  
939 than all other sgRNAs. Functional sgRNAs of true positive hit-genes (468 sgRNAs) in Library  
940 I were grouped according to their relative position within the ORF. The absolute value of the Z  
941 scores for each sgRNA were extracted and the distribution of each group against all sgRNAs in  
942 this dataset was tested by the Mann-Whitney U test. Triple asterisks indicate  $P < 0.01$ . Results  
943 are presented as box plots of absolute value of Z score for each group. Outliers outside the  
944 1.5-fold interquartile range from the box boundary were plotted individually (dots). For clarity,  
945 only sgRNAs with absolute Z scores between 0 and 4 were plotted.

946

947 Figure 6 Performance of pooled screen to identify phenotype-determined genes with reduced  
948 sgRNA sets. Results are shown for subsampling of 3, 5, 10, 15 and 30 sgRNAs for each gene  
949 (16 true positive genes in Library I). Genes without enough sgRNAs were excluded from  
950 analysis when subsampling a larger number of sgRNAs than available. Hence, 16, 16, 16, 13,  
951 13 and 12 genes were used when subsampling 3, 5, 10, 15, 20 and 30 sgRNAs per gene. Five  
952 algorithms were applied to determine the priority of sgRNA selection during subsampling (see  
953 Methods), namely Position, Cas9cal, Random, RS2, and SSC. Results are presented as box

954 plots of  $-\text{Log}_{10}(P \text{ value})$  by Mann-Whitney U test. Dashed line refers to the significance

955 threshold,  $\text{Log}_{10}(P \text{ value}) = 0.01$ , which is used in most cases of this work.

956

957

958 **References**

- 959 1. van Opijnen T, Bodi KL, Camilli A. 2009. Tn-seq: high-throughput parallel sequencing  
960 for fitness and genetic interaction studies in microorganisms. *Nat Methods* 6:767–772.
- 961 2. Wetmore KM, Price MN, Waters RJ, Lamson JS, He J, Hoover CA, Blow MJ, Bristow  
962 J, Butland G, Arkin AP, Deutschbauer A. 2015. Rapid quantification of mutant fitness in  
963 diverse bacteria by sequencing randomly bar-coded transposons. *MBio* 6:e00306-15.
- 964 3. Warner JR, Reeder PJ, Karimpour-Fard A, Woodruff LB a, Gill RT. 2010. Rapid  
965 profiling of a microbial genome using mixtures of barcoded oligonucleotides. *Nat*  
966 *Biotechnol* 28:856–62.
- 967 4. Giaever G, Chu AM, Ni L, Connelly C, Riles L, Véronneau S, Dow S, Lucau-Danila A,  
968 Anderson K, André B, Arkin AP, Astromoff A, El Bakkoury M, Bangham R, Benito R,  
969 Brachat S, Campanaro S, Curtiss M, Davis K, Deutschbauer A, Entian K-D, Flaherty P,  
970 Foury F, Garfinkel DJ, Gerstein M, Gotte D, Güldener U, Hegemann JH, Hempel S,  
971 Herman Z, Jaramillo DF, Kelly DE, Kelly SL, Kötter P, LaBonte D, Lamb DC, Lan N,  
972 Liang H, Liao H, Liu L, Luo C, Lussier M, Mao R, Menard P, Ooi SL, Revuelta JL,  
973 Roberts CJ, Rose M, Ross-Macdonald P, Scherens B, Schimmack G, Shafer B,  
974 Shoemaker DD, Sookhai-Mahadeo S, Storms RK, Strathern JN, Valle G, Voet M,  
975 Volckaert G, Wang C, Ward TR, Wilhelmy J, Winzeler EA, Yang Y, Yen G, Youngman  
976 E, Yu K, Bussey H, Boeke JD, Snyder M, Philippsen P, Davis RW, Johnston M. 2002.

- 977            Functional profiling of the *Saccharomyces cerevisiae* genome. *Nature* 418:387–391.
- 978    5.    Turner KH, Wessel AK, Palmer GC, Murray JL, Whiteley M. 2015. Essential genome  
979            of *Pseudomonas aeruginosa* in cystic fibrosis sputum. *Proc Natl Acad Sci*  
980            112:4110–4115.
- 981    6.    Freed EF, Winkler JD, Weiss SJ, Garst AD, Mutalik VK, Arkin AP, Knight R, Gill RT.  
982            2015. Genome-Wide Tuning of Protein Expression Levels to Rapidly Engineer  
983            Microbial Traits. *ACS Synth Biol* 4:1244–1253.
- 984    7.    Jiang W, Bikard D, Cox D, Zhang F, Marraffini L a. 2013. RNA-guided editing of  
985            bacterial genomes using CRISPR-Cas systems. *Nat Biotechnol* 31:233–9.
- 986    8.    Cong L, Ran FA, Cox D, Lin S, Barretto R, Habib N, Hsu PD, Wu X, Jiang W,  
987            Marraffini L a, Zhang F. 2013. Multiplex genome engineering using CRISPR/Cas  
988            systems. *Science* 339:819–23.
- 989    9.    Wang H, Yang H, Shivalila CS, Dawlaty MM, Cheng AW, Zhang F, Jaenisch R. 2013.  
990            One-step generation of mice carrying mutations in multiple genes by  
991            CRISPR/Cas-mediated genome engineering. *Cell* 153:910–8.
- 992    10.   Hwang WY, Fu Y, Reyon D, Maeder ML, Tsai SQ, Sander JD, Peterson RT, Yeh J-RJ,  
993            Joung JK. 2013. Efficient genome editing in zebrafish using a CRISPR-Cas system. *Nat*  
994            *Biotechnol* 31:227–229.
- 995    11.   DiCarlo JE, Norville JE, Mali P, Rios X, Aach J, Church GM. 2013. Genome

- 996 engineering in *Saccharomyces cerevisiae* using CRISPR-Cas systems. *Nucleic Acids*  
997 *Res* 41:4336–4343.
- 998 12. Bassett AR, Tibbit C, Ponting CP, Liu J-L. 2014. Mutagenesis and homologous  
999 recombination in *Drosophila* cell lines using CRISPR/Cas9. *Biol Open* 3:42–49.
- 1000 13. Tzelepis K, Koike-Yusa H, De Braekeleer E, Li Y, Metzakopian E, Dovey OM, Mupo  
1001 A, Grinkevich V, Li M, Mazan M, Gozdecka M, Ohnishi S, Cooper J, Patel M,  
1002 McKerrell T, Chen B, Domingues AF, Gallipoli P, Teichmann S, Ponstingl H,  
1003 McDermott U, Saez-Rodriguez J, Huntly BJP, Iorio F, Pina C, Vassiliou GS, Yusa K.  
1004 2016. A CRISPR Dropout Screen Identifies Genetic Vulnerabilities and Therapeutic  
1005 Targets in Acute Myeloid Leukemia. *Cell Rep* 17:1193–1205.
- 1006 14. Sanjana NE, Shalem O, Zhang F. 2014. Improved vectors and genome-wide libraries for  
1007 CRISPR screening. *Nat Methods* 11:783–784.
- 1008 15. Gilbert LA, Horlbeck MA, Adamson B, Villalta JE, Chen Y, Whitehead EH, Guimaraes  
1009 C, Panning B, Ploegh HL, Bassik MC, Qi LS, Kampmann M, Weissman JS. 2014.  
1010 Genome-Scale CRISPR-Mediated Control of Gene Repression and Activation. *Cell*  
1011 159:647–61.
- 1012 16. Qi LS, Larson MH, Gilbert LA, Doudna JA, Weissman JS, Arkin AP, Lim WA. 2013.  
1013 Repurposing CRISPR as an RNA-guided platform for sequence-specific control of gene  
1014 expression. *Cell* 152:1173–83.

- 1015 17. Konermann S, Brigham MD, Trevino AE, Joung J, Abudayyeh OO, Barcena C, Hsu PD,  
1016 Habib N, Gootenberg JS, Nishimasu H, Nureki O, Zhang F. 2014. Genome-scale  
1017 transcriptional activation by an engineered CRISPR-Cas9 complex. *Nature*  
1018 517:583–588.
- 1019 18. Otoupal PB, Erickson KE, Bordoy AE, Chatterjee A. 2016. CRISPR perturbation of  
1020 gene expression alters bacterial fitness under stress and reveals underlying epistatic  
1021 constraints. *ACS Synth Biol* acssynbio.6b00050.
- 1022 19. Lv L, Ren Y-L, Chen J-C, Wu Q, Chen G-Q. 2015. Application of CRISPRi for  
1023 prokaryotic metabolic engineering involving multiple genes, a case study: Controllable  
1024 P(3HB-co-4HB) biosynthesis. *Metab Eng* 29:160–8.
- 1025 20. Choudhary E, Thakur P, Pareek M, Agarwal N. 2015. Gene silencing by CRISPR  
1026 interference in mycobacteria. *Nat Commun* 6:6267.
- 1027 21. Yao L, Cengic I, Anfelt J, Hudson EP. 2016. Multiple Gene Repression in  
1028 Cyanobacteria Using CRISPRi. *ACS Synth Biol* 5:207–212.
- 1029 22. Xu T, Li Y, Shi Z, Hemme CL, Li Y, Zhu Y, Van Nostrand JD, He Z, Zhou J. 2015.  
1030 Efficient Genome Editing in *Clostridium cellulolyticum* via CRISPR-Cas9 Nickase.  
1031 *Appl Environ Microbiol* 81:4423–31.
- 1032 23. Peters JM, Colavin A, Shi H, Czarny TL, Larson MH, Wong S, Hawkins JS, Lu CHS,  
1033 Koo B-M, Marta E, Shiver AL, Whitehead EH, Weissman JS, Brown ED, Qi LS, Huang



- 1034 KC, Gross CA. 2016. A Comprehensive, CRISPR-based Functional Analysis of  
1035 Essential Genes in Bacteria. *Cell* 165:1493–506.
- 1036 24. Struhl K. 1999. Fundamentally Different Logic of Gene Regulation in Eukaryotes and  
1037 Prokaryotes. *Cell* 98:1–4.
- 1038 25. Kuzminov A. 2014. The Precarious Prokaryotic Chromosome. *J Bacteriol*  
1039 196:1793–1806.
- 1040 26. Horlbeck MA, Gilbert LA, Villalta JE, Adamson B, Pak RA, Chen Y, Fields AP, Park  
1041 CY, Corn JE, Kampmann M, Weissman JS. 2016. Compact and highly active  
1042 next-generation libraries for CRISPR-mediated gene repression and activation. *Elife*  
1043 5:339–350.
- 1044 27. Doench JG, Fusi N, Sullender M, Hegde M, Vaimberg EW, Donovan KF, Smith I,  
1045 Tothova Z, Wilen C, Orchard R, Virgin HW, Listgarten J, Root DE. 2016. Optimized  
1046 sgRNA design to maximize activity and minimize off-target effects of CRISPR-Cas9.  
1047 *Nat Biotechnol* 34:184–191.
- 1048 28. Chari R, Mali P, Moosburner M, Church GM. 2015. Unraveling CRISPR-Cas9 genome  
1049 engineering parameters via a library-on-library approach. *Nat Methods* 1–7.
- 1050 29. Baba T, Ara T, Hasegawa M, Takai Y, Okumura Y, Baba M, Datsenko KA, Tomita M,  
1051 Wanner BL, Mori H. 2006. Construction of *Escherichia coli* K-12 in-frame, single-gene  
1052 knockout mutants: the Keio collection. *Mol Syst Biol* 2:2006.0008.

- 1053 30. Nichols RJ, Sen S, Choo YJ, Beltrao P, Zietek M, Chaba R, Lee S, Kazmierczak KM,  
1054 Lee KJ, Wong A, Shales M, Lovett S, Winkler ME, Krogan NJ, Typas A, Gross CA.  
1055 2011. Phenotypic landscape of a bacterial cell. *Cell* 144:143–56.
- 1056 31. Gama-Castro S, Salgado H, Santos-Zavaleta A, Ledezma-Tejeida D, Muñiz-Rascado L,  
1057 García-Sotelo JS, Alquicira-Hernández K, Martínez-Flores I, Pannier L,  
1058 Castro-Mondragón JA, Medina-Rivera A, Solano-Lira H, Bonavides-Martínez C,  
1059 Pérez-Rueda E, Alquicira-Hernández S, Porrón-Sotelo L, López-Fuentes A,  
1060 Hernández-Koutoucheva A, Del Moral-Chavez V, Rinaldi F, Collado-Vides J. 2016.  
1061 RegulonDB version 9.0: High-level integration of gene regulation, coexpression, motif  
1062 clustering and beyond. *Nucleic Acids Res* 44:D133–D143.
- 1063 32. Engler C, Gruetzner R, Kandzia R, Marillonnet S. 2009. Golden gate shuffling: a  
1064 one-pot DNA shuffling method based on type II restriction enzymes. *PLoS One*  
1065 4:e5553.
- 1066 33. Kampmann M, Bassik MC, Weissman JS. 2013. Integrated platform for genome-wide  
1067 screening and construction of high-density genetic interaction maps in mammalian cells.  
1068 *Proc Natl Acad Sci U S A* 110:E2317-26.
- 1069 34. Mee MT, Collins JJ, Church GM, Wang HH. 2014. Syntrophic exchange in synthetic  
1070 microbial communities. *Proc Natl Acad Sci U S A* 111:E2149-56.
- 1071 35. Conway T, Creecy JP, Maddox SM, Grissom JE, Conkle TL, Shadid TM, Teramoto J,

- 1072 San Miguel P, Shimada T, Ishihama A, Mori H, Wanner BL. 2014. Unprecedented  
1073 high-resolution view of bacterial operon architecture revealed by RNA sequencing.  
1074 MBio 5:e01442-14.
- 1075 36. Basturea GN, Rudd KE, Deutscher MP. 2006. Identification and characterization of  
1076 RsmE, the founding member of a new RNA base methyltransferase family. RNA  
1077 12:426–34.
- 1078 37. Chuai G-H, Wang Q-L, Liu Q. 2017. In Silico Meets In Vivo: Towards Computational  
1079 CRISPR-Based sgRNA Design. Trends Biotechnol 35:12–21.
- 1080 38. Farasat I, Salis HM. 2016. A Biophysical Model of CRISPR/Cas9 Activity for Rational  
1081 Design of Genome Editing and Gene Regulation. PLoS Comput Biol 12:e1004724.
- 1082 39. Xu H, Xiao T, Chen C-H, Li W, Meyer CA, Wu Q, Wu D, Cong L, Zhang F, Liu JS,  
1083 Brown M, Liu XS. 2015. Sequence determinants of improved CRISPR sgRNA design.  
1084 Genome Res 25:1147–57.
- 1085 40. Binder S, Siedler S, Marienhagen J, Bott M, Eggeling L. 2013. Recombineering in  
1086 *Corynebacterium glutamicum* combined with optical nanosensors: a general strategy for  
1087 fast producer strain generation. Nucleic Acids Res 41:6360–9.
- 1088 41. Zhang Y, Buchholz F, Muyrers JPP, Stewart AF. 1998. A new logic for DNA  
1089 engineering using recombination in *Escherichia coli*. Nature 20:123–128.
- 1090 42. Walsh RM, Hochedlinger K, Braff J, Moosburner M, Yaung S, Church G, Norville J,

- 1091 Church G, Jiang W, Marraffini L, Zhang F. 2013. A variant CRISPR-Cas9 system adds  
1092 versatility to genome engineering. *Proc Natl Acad Sci* 110:15514–15515.
- 1093 43. Sun Z, Deng A, Hu T, Wu J, Sun Q, Bai H, Zhang G, Wen T. 2015. A high-efficiency  
1094 recombineering system with PCR-based ssDNA in *Bacillus subtilis* mediated by the  
1095 native phage recombinase GP35. *Appl Microbiol Biotechnol* 99:5151–5162.
- 1096 44. Gallagher LA, Ramage E, Patrapuvich R, Weiss E, Brittnacher M, Manoil C. 2013.  
1097 Sequence-defined transposon mutant library of *Burkholderia thailandensis*. *MBio*  
1098 4:e00604-13.
- 1099 45. Baugh L, Gallagher LA, Patrapuvich R, Clifton MC, Gardberg AS, Edwards TE,  
1100 Armour B, Begley DW, Dieterich SH, Dranow DM, Abendroth J, Fairman JW, Fox D,  
1101 Staker BL, Phan I, Gillespie A, Choi R, Nakazawa-Hewitt S, Nguyen MT, Napuli A,  
1102 Barrett L, Buchko GW, Stacy R, Myler PJ, Stewart LJ, Manoil C, Van Voorhis WC.  
1103 2013. Combining Functional and Structural Genomics to Sample the Essential  
1104 *Burkholderia* Structome. *PLoS One* 8:e53851.
- 1105 46. Wurtzel O, Sesto N, Mellin JR, Karunker I, Edelheit S, Bécavin C, Archambaud C,  
1106 Cossart P, Sorek R. 2012. Comparative transcriptomics of pathogenic and  
1107 non-pathogenic *Listeria* species. *Mol Syst Biol* 8:583.
- 1108 47. Dar D, Shamir M, Mellin JR, Koutero M, Stern-Ginossar N, Cossart P, Sorek R. 2016.  
1109 Term-seq reveals abundant ribo-regulation of antibiotics resistance in bacteria. *Science*

- 1110 (80- ) 352:aad9822-aad9822.
- 1111 48. Zhu S, Li W, Liu J, Chen C-H, Liao Q, Xu P, Xu H, Xiao T, Cao Z, Peng J, Yuan P,  
1112 Brown M, Shirley Liu X, Wei W. 2016. Genome-scale deletion screening of human long  
1113 non-coding RNAs using a paired-guide RNA CRISPR–Cas9 library. *Nat Biotechnol*  
1114 1–10.
- 1115 49. Liu SJ, Horlbeck MA, Cho SW, Birk HS, Malatesta M, He D, Attenello FJ, Villalta JE,  
1116 Cho MY, Chen Y, Mandegar MA, Olvera MP, Gilbert LA, Conklin BR, Chang HY,  
1117 Weissman JS, Lim DA. 2017. CRISPRi-based genome-scale identification of functional  
1118 long noncoding RNA loci in human cells. *Science* (80- ) 355.
- 1119 50. Garst AD, Bassalo MC, Pines G, Lynch SA, Halweg-Edwards AL, Liu R, Liang L,  
1120 Wang Z, Zeitoun R, Alexander WG, Gill RT. 2016. Genome-wide mapping of  
1121 mutations at single-nucleotide resolution for protein, metabolic and genome  
1122 engineering. *Nat Biotechnol* 35:48–55.
- 1123 51. Pozsgai ER, Blair KM, Kearns DB. 2012. Modified mariner transposons for random  
1124 inducible-expression insertions and transcriptional reporter fusion insertions in *Bacillus*  
1125 *subtilis*. *Appl Environ Microbiol* 78:778–85.
- 1126 52. Oakes BL, Nadler DC, Flamholz A, Fellmann C, Staahl BT, Doudna JA, Savage DF.  
1127 2016. Profiling of engineering hotspots identifies an allosteric CRISPR-Cas9 switch.  
1128 *Nat Biotechnol*.

- 1129 53. Heigwer F, Kerr G, Boutros M. 2014. E-CRISP: fast CRISPR target site identification.  
1130 Nat Methods 11:122–123.
- 1131 54. Liu H, Wei Z, Dominguez A, Li Y, Wang X, Qi LS. 2015. CRISPR-ERA: a  
1132 comprehensive design tool for CRISPR-mediated gene editing, repression and  
1133 activation. *Bioinformatics* 31:3676–3678.
- 1134 55. Connell MRO, Oakes BL, Sternberg SH, East-seletsky A, Kaplan M, Doudna JA. 2014.  
1135 Programmable RNA recognition and cleavage by CRISPR/Cas9. *Nature* 516:263–266.
- 1136 56. Nelles DA, Fang MY, O’Connell MR, Xu JL, Markmiller SJ, Doudna JA, Yeo GW.  
1137 2016. Programmable RNA Tracking in Live Cells with CRISPR/Cas9. *Cell*  
1138 165:488–496.
- 1139 57. Liu Y, Chen Z, He A, Zhan Y, Li J, Liu L, Wu H, Zhuang C, Lin J, Zhang Q, Huang W.  
1140 2016. Targeting cellular mRNAs translation by CRISPR-Cas9. *Sci Rep* 6:29652.
- 1141 58. Goh S, Hohmeier A, Stone TC, Offord V, Sarabia F, Garcia-Ruiz C, Good L. 2015.  
1142 Silencing of Essential Genes within a Highly Coordinated Operon in *Escherichia coli*.  
1143 *Appl Environ Microbiol* 81:5650–5659.
- 1144 59. Smith JD, Suresh S, Schlecht U, Wu M, Wagih O, Peltz G, Davis RW, Steinmetz LM,  
1145 Parts L, St Onge RP. 2016. Quantitative CRISPR interference screens in yeast identify  
1146 chemical-genetic interactions and new rules for guide RNA design. *Genome Biol* 17:45.
- 1147 60. Cui L, Bikard D. 2016. Consequences of Cas9 cleavage in the chromosome of

- 1148            Escherichia coli. *Nucleic Acids Res* 44:4243–4251.
- 1149    61.    Bikard D, Jiang W, Samai P, Hochschild A, Zhang F, Marraffini LA. 2013.
- 1150            Programmable repression and activation of bacterial gene expression using an
- 1151            engineered CRISPR-Cas system. *Nucleic Acids Res* 41:7429–37.
- 1152    62.    Gibson DG, Young L, Chuang R-Y, Venter JC, Hutchison CA, Smith HO. 2009.
- 1153            Enzymatic assembly of DNA molecules up to several hundred kilobases. *Nat Methods*
- 1154            6:343–5.
- 1155    63.    Neidhardt FC, Bloch PL, Smith DF. 1974. Culture medium for enterobacteria. *J*
- 1156            *Bacteriol* 119:736–47.
- 1157    64.    Murphy KC, Campellone KG, Poteete AR. 2000. PCR-mediated gene replacement in
- 1158            Escherichia coli. *Gene* 246:321–330.
- 1159    65.    Jiang Y, Chen B, Duan C, Sun B, Yang J, Yang S. 2015. Multigene editing in the
- 1160            Escherichia coli genome using the CRISPR-Cas9 system. *Appl Environ Microbiol*
- 1161            81:AEM.04023-14.
- 1162    66.    Zhao J, Li Q, Sun T, Zhu X, Xu H, Tang J, Zhang X, Ma Y. 2013. Engineering central
- 1163            metabolic modules of Escherichia coli for improving  $\beta$ -carotene production. *Metab Eng*
- 1164            17:42–50.
- 1165    67.    Amann E, Ochs B, Abel KJ. 1988. Tightly regulated tac promoter vectors useful for the
- 1166            expression of unfused and fused proteins in Escherichia coli. *Gene* 69:301–315.

- 1167 68. Lutz R, Bujard H. 1997. Independent and tight regulation of transcriptional units in  
1168 *Escherichia coli* via the LacR/O, the TetR/O and AraC/I1-I2 regulatory elements.  
1169 *Nucleic Acids Res* 25:1203–1210.
- 1170 69. Salis HM, Mirsky EA, Voigt CA. 2009. Automated design of synthetic ribosome  
1171 binding sites to control protein expression. *Nat Biotechnol* 27:946–50.
- 1172 70. Knaus R, Bujard H. 1988. PL of coliphage lambda: an alternative solution for an  
1173 efficient promoter. *EMBO J* 7:2919–2923.
- 1174 71. Ronda C, Pedersen LE, Sommer MOA, Nielsen AT. 2016. CRMAGE: CRISPR  
1175 Optimized MAGE Recombineering. *Sci Rep* 6:19452.
- 1176 72. Jiang H, Wong WH. 2008. SeqMap: Mapping massive amount of oligonucleotides to  
1177 the genome. *Bioinformatics* 24:2395–2396.
- 1178 73. Hsu PD, Scott DA, Weinstein JA, Ran FA, Konermann S, Agarwala V, Li Y, Fine EJ,  
1179 Wu X, Shalem O, Cradick TJ, Marraffini LA, Bao G, Zhang F. 2013. DNA targeting  
1180 specificity of RNA-guided Cas9 nucleases. *Nat Biotechnol* 31:827–32.
- 1181 74. Sander JD, Joung JK. 2014. CRISPR-Cas systems for editing, regulating and targeting  
1182 genomes. *Nat Biotechnol* 32:347–355.
- 1183 75. Li W, Köster J, Xu H, Chen C-H, Xiao T, Liu JS, Brown M, Liu XS. 2015. Quality  
1184 control, modeling, and visualization of CRISPR screens with MAGeCK-VISPR.  
1185 *Genome Biol* 16:281.



1186

1187 **Author Contributions**

1188 T.W., C.Z. and X.X. proposed the general design of this work. T.W. and J.G. performed the  
1189 experiments. T.W. and C.G. performed the data processing. Y.W. helped with plasmid  
1190 construction. B.L. prepared the plasmid library. T.W., J.G., Z.X., C.Z. and X.X. analysed the  
1191 results. T.W., J.G. and C.Z. wrote the manuscript based on discussion among all authors.

1192

1193 **Competing financial interests**

1194 The authors declare no competing financial interests.

1195

1196 **Acknowledgements**

1197 This work was supported by National Natural Science Foundation of China (NSFC21627812)  
1198 and Tsinghua University Initiative Scientific Research Program (20161080108).

1199

1200 **Availability of data and materials**

1201 The authors declare that all data supporting the findings of this study are available within the  
1202 article and other files such as homemade scripts are available from the corresponding author  
1203 upon request.

Figure 1

**Library design**

**Library construction**

**Selection**

**sgRNA fitness calculation**

**Gene fitness calculation**

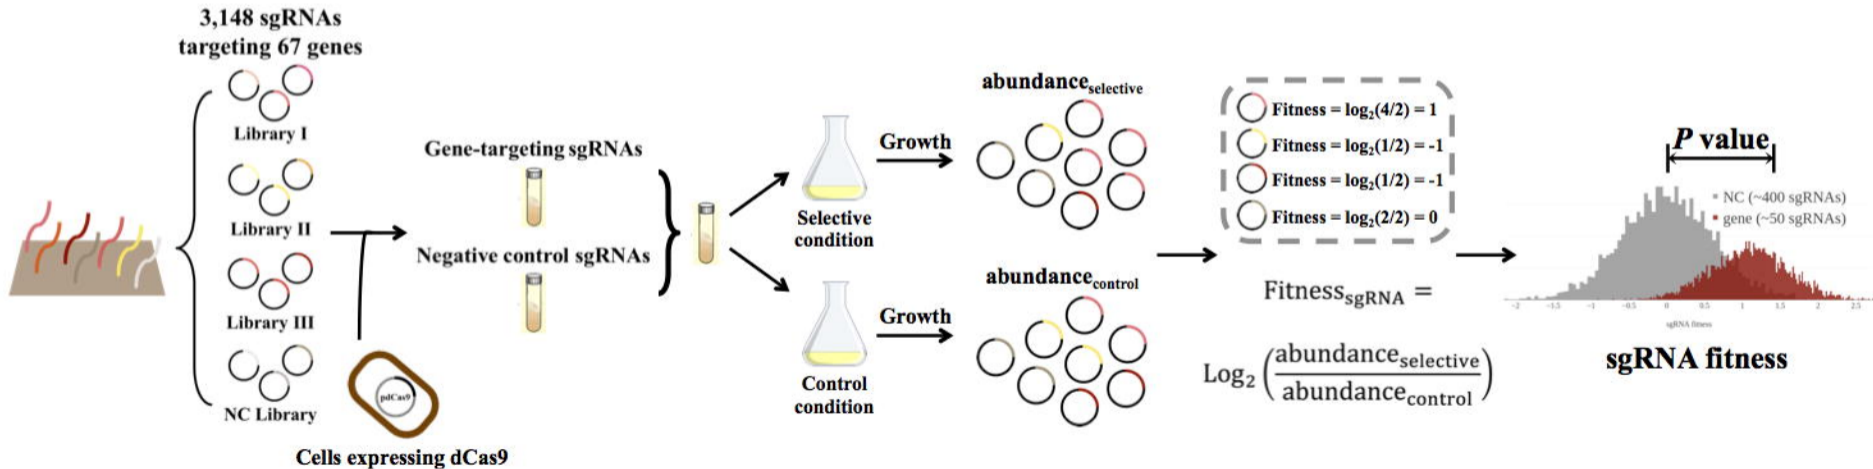

Figure 2

(a)

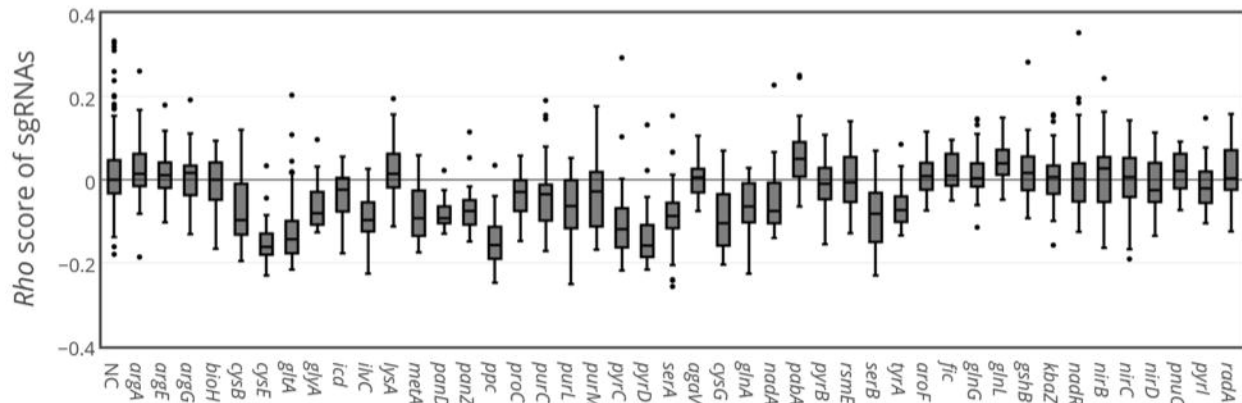

(b)

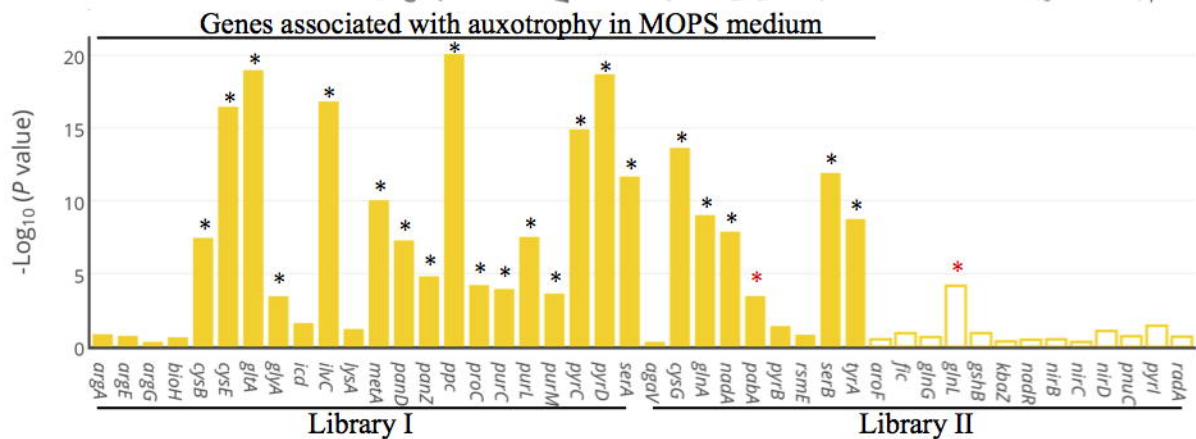

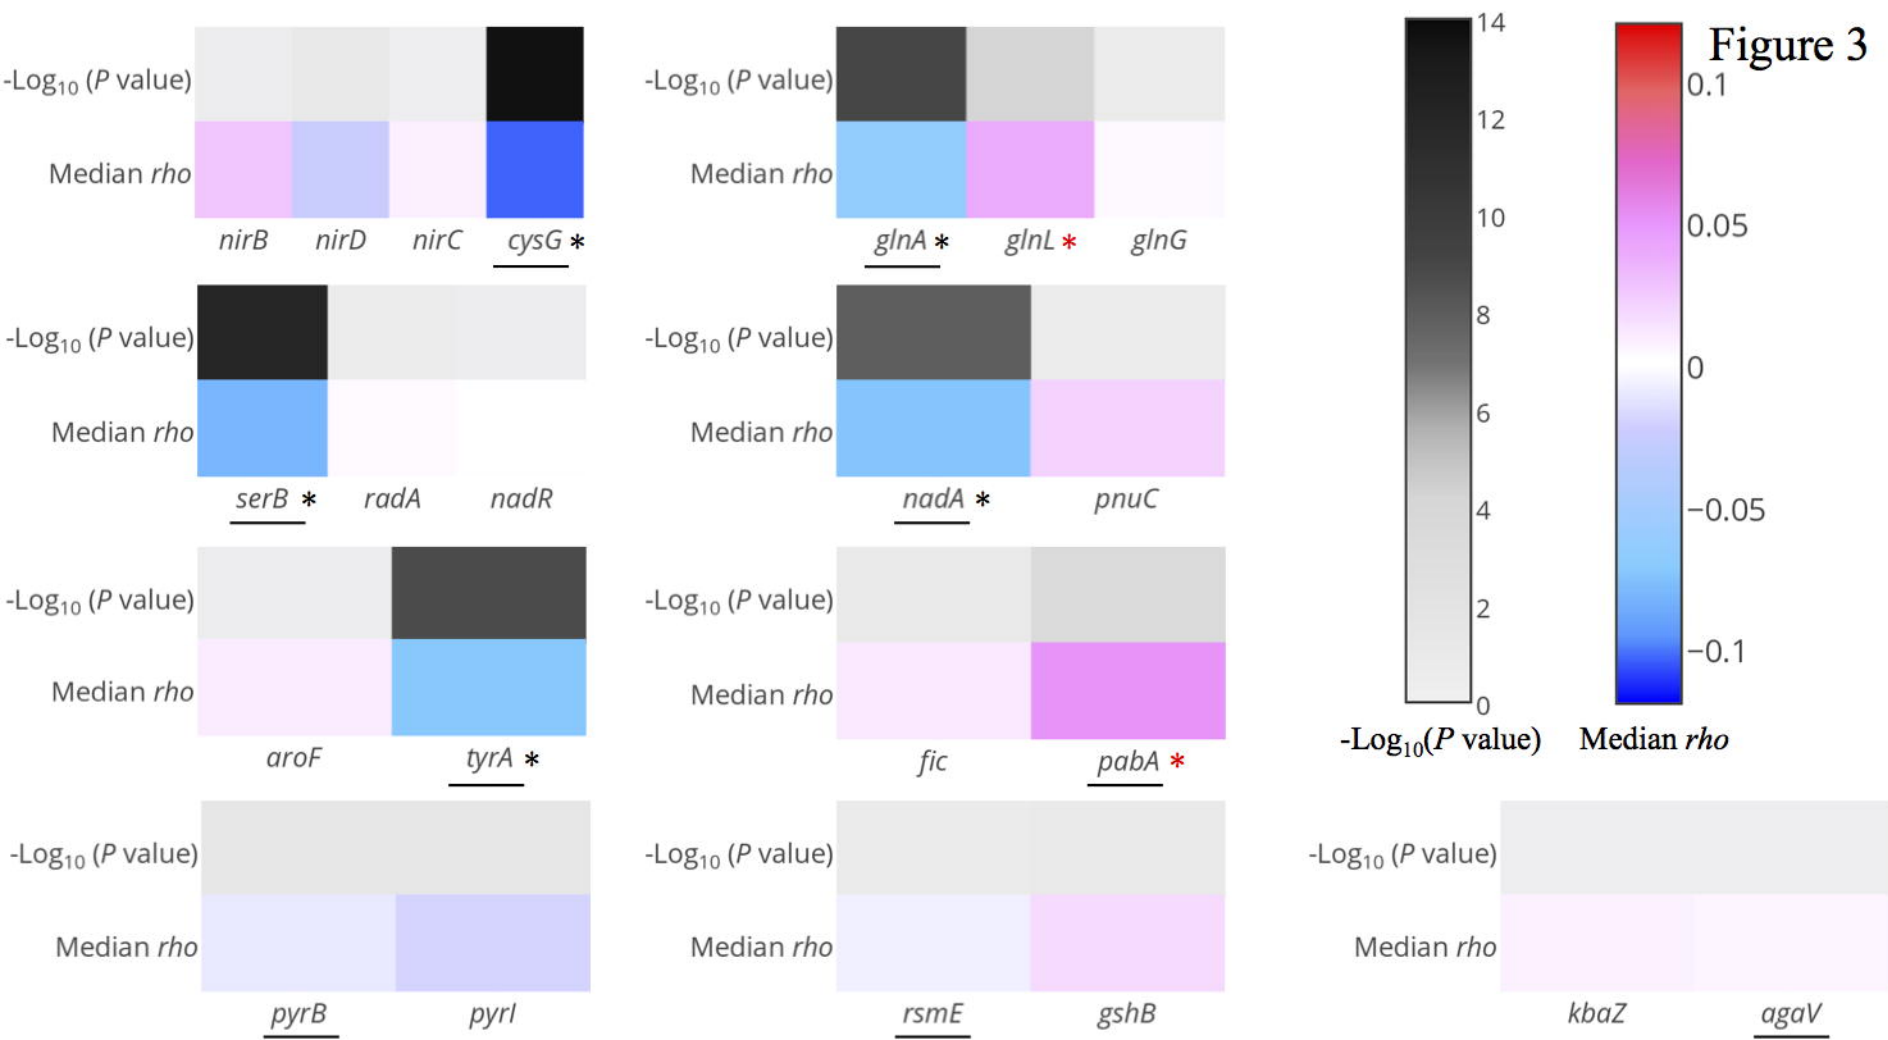

Figure 4

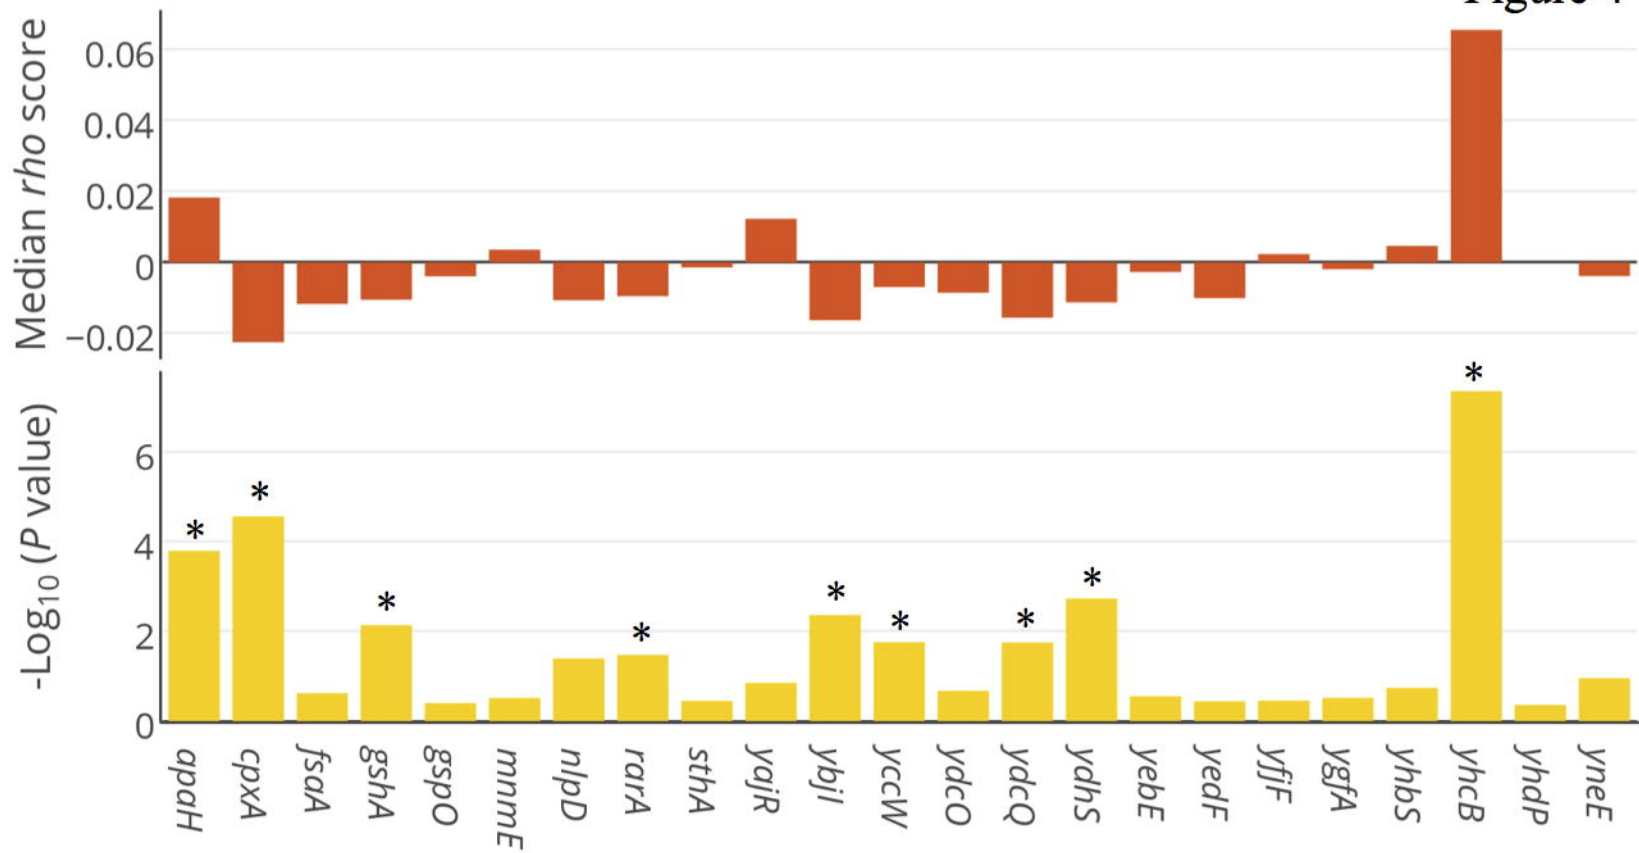

Figure 5

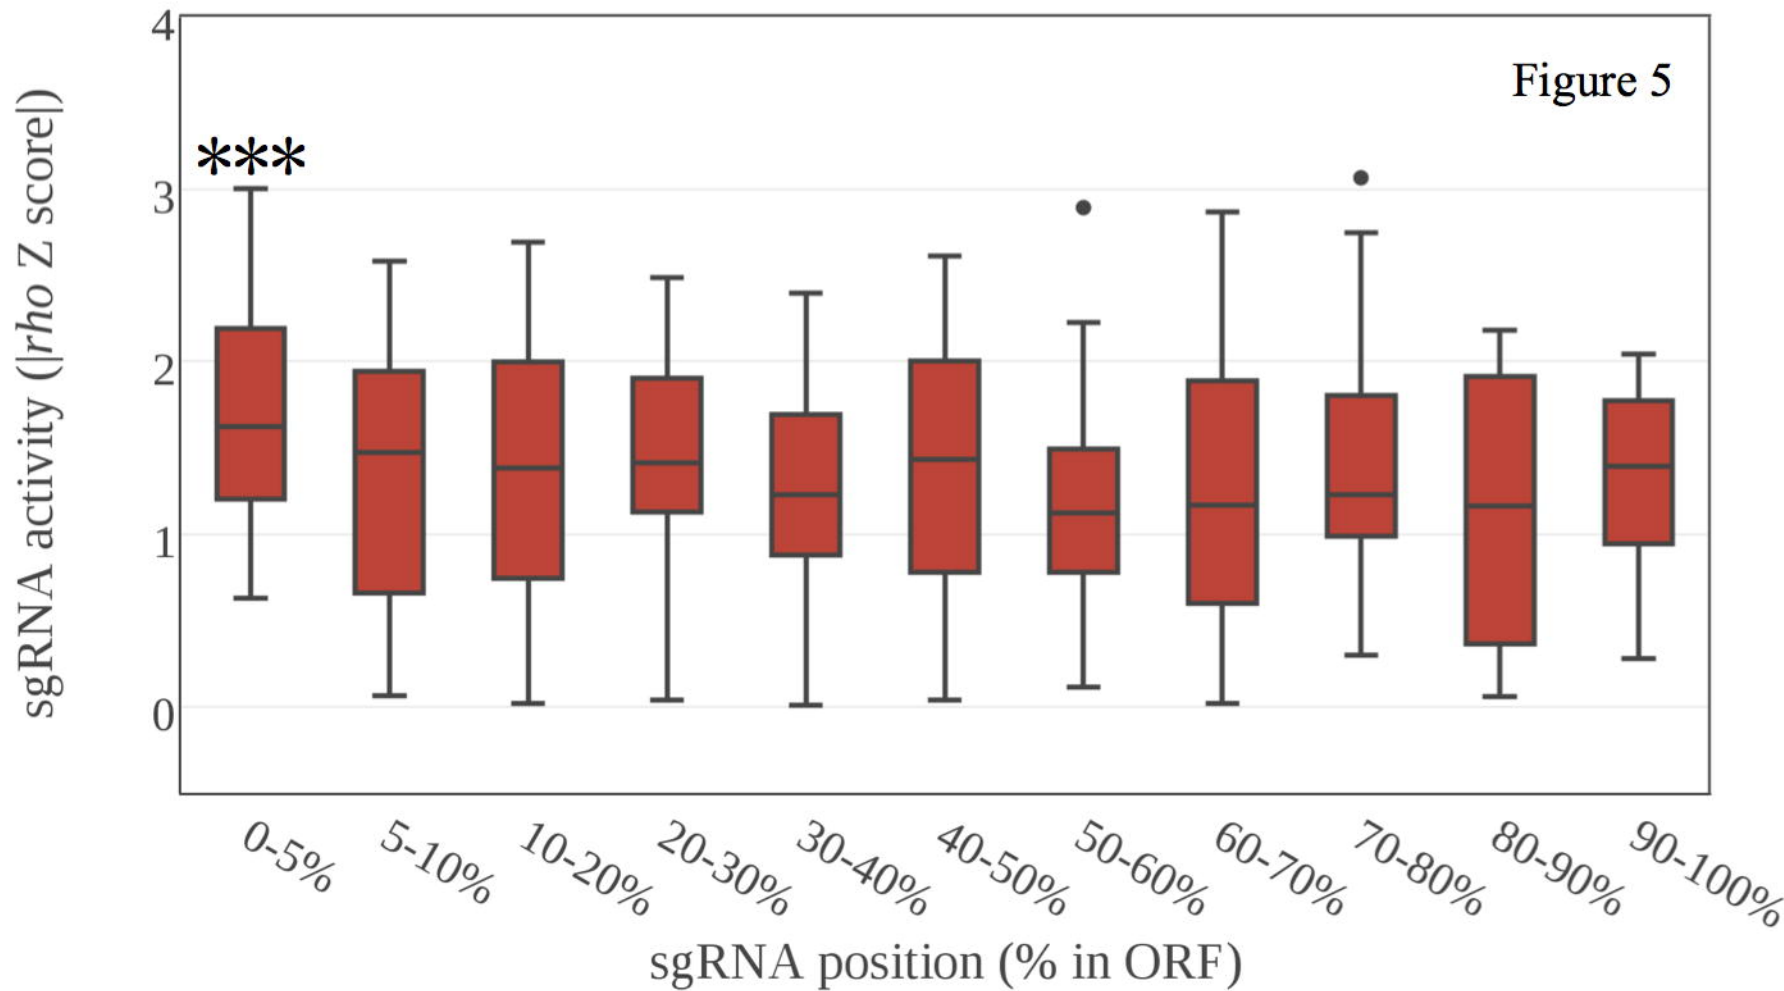

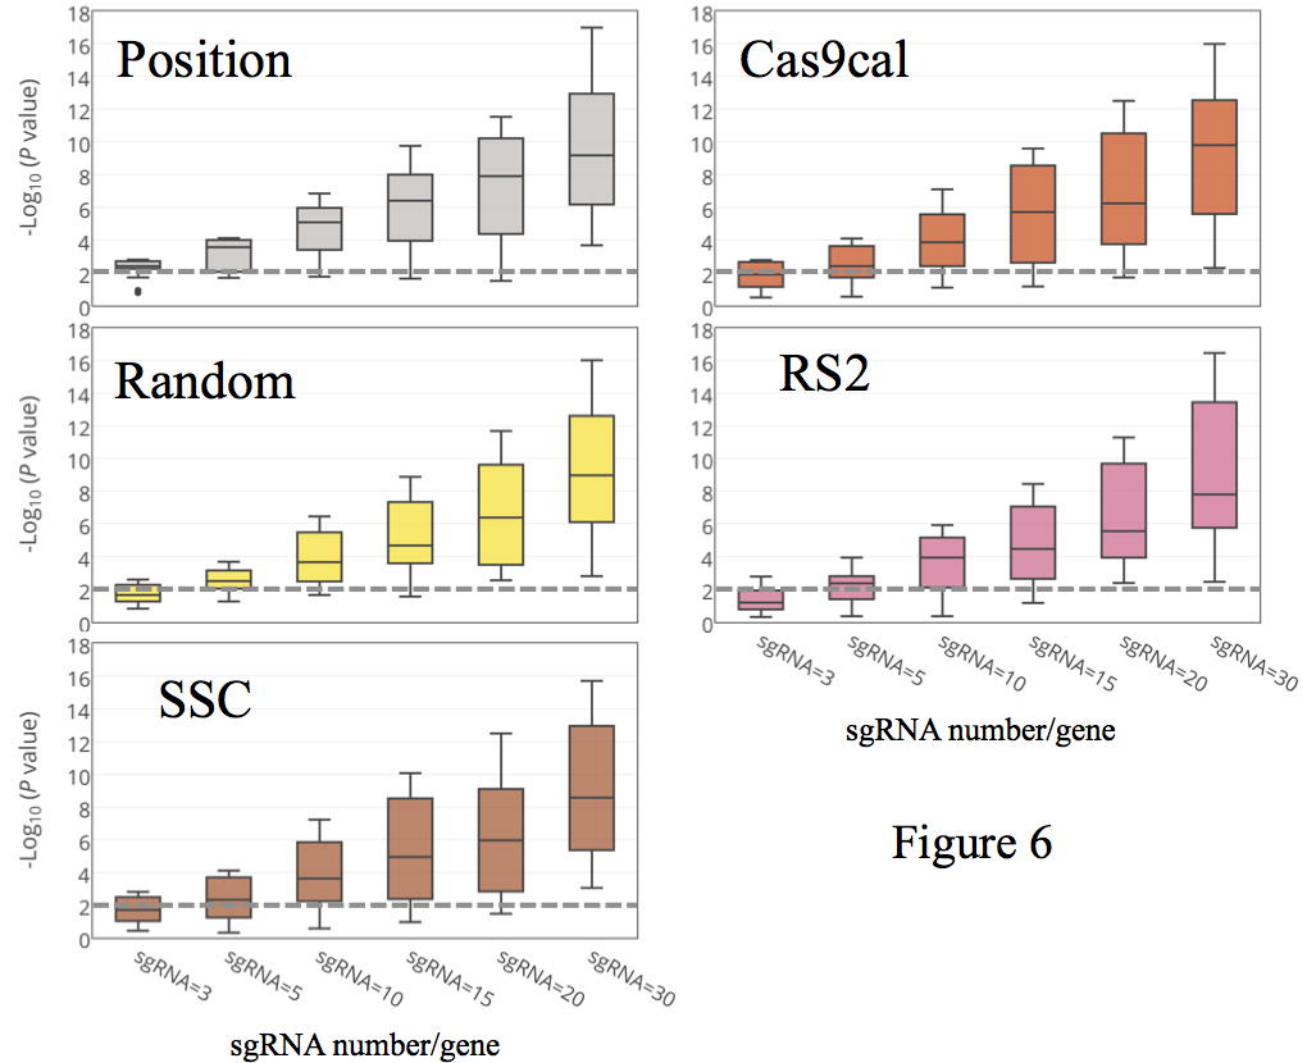

Figure 6
